1 **A new model of spinal cord injury by cryoapplication:**

2 **Morphodynamics of histological changes of the spinal cord lesion**

3  
4 George B. Telegin<sup>1\*</sup>, Alexey N. Minakov<sup>1</sup>, Aleksandr S. Chernov<sup>1</sup>, Vitaly A. Kazakov<sup>2</sup>, Elena A.  
5 Kalabina<sup>2</sup>, Alexey A. Belogurov<sup>3</sup>, Nikolay A. Konovalov<sup>5</sup>, Aleksandr G Gabibov<sup>4</sup>

6  
7 <sup>1</sup> Animal breeding facility, Branch of Shemyakin and Ovchinnikov Institute of Bioorganic  
8 Chemistry of the Russian Academy of Sciences, Pushchino, Moscow region, Russian  
9 Federation;

10 <sup>2</sup> Laboratory of Biological Testing, Branch of Shemyakin and Ovchinnikov Institute of  
11 Bioorganic Chemistry of the Russian Academy of Sciences, Pushchino, Moscow region,  
12 Russian Federation;

13 <sup>3</sup> Laboratory of molecular biomedicine, Shemyakin and Ovchinnikov Institute of Bioorganic  
14 Chemistry of the Russian Academy of Sciences, Moscow, Russian Federation;

15 <sup>4</sup> Laboratory of biocatalysis, Shemyakin and Ovchinnikov Institute of Bioorganic Chemistry of  
16 the Russian Academy of Sciences, Moscow, Russian Federation;

17 <sup>5</sup> Department of spinal neurosurgery, N.N. Burdenko National Scientific and Practical Center for  
18 Neurosurgery, RF Health Ministry, Moscow, Russian Federation;

19  
20 \* Corresponding author

21 E-mail: telegin@bibch.ru

22  
23 **Abstract**

24 Up to 500,000 people worldwide suffer from spinal cord injuries (SCI) annually,  
25 according to the WHO. Animal models are essential for searching novel methodological  
26 guidelines and therapeutic agents for SCI treatment. We developed an original model of

27 posttraumatic spinal cord glial scar in rats using cryoapplication. The method is based on  
28 cryodestruction of spinal cord tissue with liquid nitrogen. Thirty six male SD linear rats of SPF  
29 category were included in this experimental study. A T13 unilateral hemilaminectomy was  
30 performed with an operating microscope, as it was extremely important not to penetrate the dura  
31 mater, and liquid nitrogen was applied into the bone defect for one minute. The animals were  
32 euthanized at various intervals ranging from 1 to 60 days after inducing cryogenic trauma, their  
33 Th12-L1 vertebrae were removed “en bloc” and the segment of the spinal cord exposed to the  
34 cryoapplicator was carefully separated for histological examination. The study results  
35 demonstrated that cryoapplication of liquid nitrogen, provoking a local temperature of  
36 approximately minus 20°C, produced a highly standardized transmural defect which extended  
37 throughout the dorsoventral arrangement of the spinal cord and had an “hour-glass” shape.  
38 During the entire study period (1-60 post-injury days), the glial scarring process and the spinal  
39 cord defect were located within the surgically approached vertebral space (Th13). Unlike other  
40 available experimental models of SCI (compression, contusion, chemical, etc.), the present  
41 option is characterized by a minimal invasiveness (the hemilaminectomy is less than 1 mm  
42 wide), high precision and consistency. Also, there was a low interanimal variability in  
43 histological lesions and dimensions of the produced defect. The original design of cryoapplicator  
44 used in the study played a major role in achieving these results. The original technique of high-  
45 precision cryoapplication for inducing consistent morphodynamic glial scarring could facilitate a  
46 better understanding of the self-recovery processes of injured spinal cord and would be helpful  
47 for proposing new platforms for the development of therapeutic strategies.

48

## 49 **Introduction**

50 Spinal cord injury (SCI) is one of the main causes of disability associated with the  
51 inevitable formation of a glial scar in the posttraumatic period, which impedes the regenerative  
52 axonal growth through the site of the lesion [1-3]. An extensive research of potential therapeutic

53 solutions has not provided promising results so far [4-5], though some of the recently proposed  
54 therapeutic protocols, such as epidural stimulation, seem to be more encouraging [6-8].  
55 Therefore, it appears evident that reliable and easily reproducible animal models are needed for  
56 testing potential treatments.

57 Rodent models are typically used in the experiments with SCI induction to assess  
58 compression- or contusion-simulating impact [9-11]. Though these SCI models reproduce a  
59 realistic clinical course of the spinal cord injury in humans, they have multiple drawbacks, in  
60 particular, the impossibility to induce a «standardized» defect. In this context, the glial scarring  
61 process in the experimental SCI simulation is accompanied by a poor reproducibility. This  
62 limitation poses a serious challenge for proposing therapeutic agents (treatments) based on the  
63 experimental data.

64 Since post-traumatic glial scars either fully prevent or significantly affect the growth of  
65 axons through the defect site after SCI [12], it seems to be important and promising to find novel  
66 methods of SCI simulation that would ensure a reliable reproducibility of a standardized  
67 controlled glial scar. Our research group has recently described a new technique of SCI induction  
68 in experimental rats which is based on the local cryodestruction to produce a standardized glial  
69 scar [13]. The goal of the present study is to review the time course of histological changes and  
70 the formation of a glial scar using the proposed experimental SCI model.

71

## 72 **Results**

### 73 **Acute period after SCI**

74 The macro- and microscopic patterns of the damaged site were inspected and compared  
75 with the contralateral non-injured area. Macroscopically the injured area differed significantly  
76 from the non-damaged side of the cord (Fig 1) and was always located at the level of the surgical  
77 approach (Fig 2).

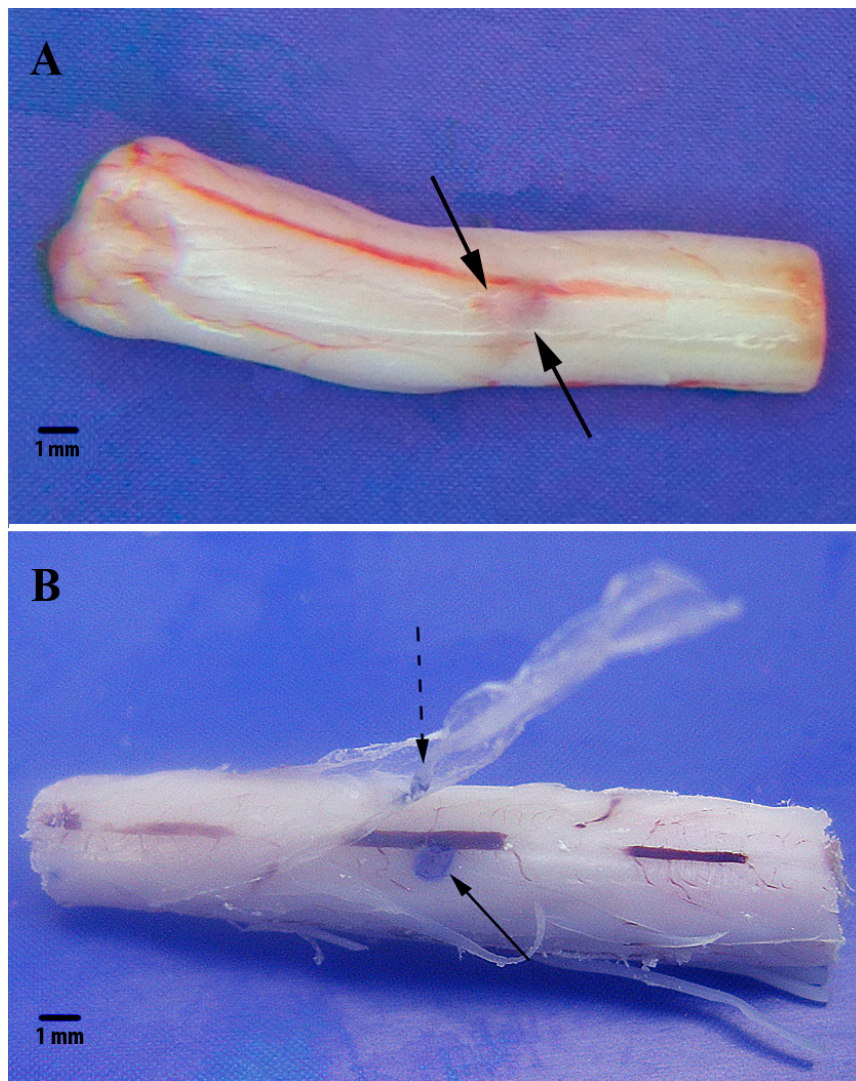

78

79 **Fig 1. Isolated sample of the spinal cord of a rat 1 day after cryoapplication.** A –  
80 macroscopical appearance of the lesion in the area of cryoapplication. Scale bar, 1 mm. B –  
81 Methylene blue staining gives a clearer view of the lesioned area (solid arrow) as well of the  
82 adjacent dura mater (dotted arrow).

83

84 It is worth noting that the injured area of the spinal cord was strictly limited by the  
85 projection of the site of the laminectomy -Th13 vertebra - (Fig 2).

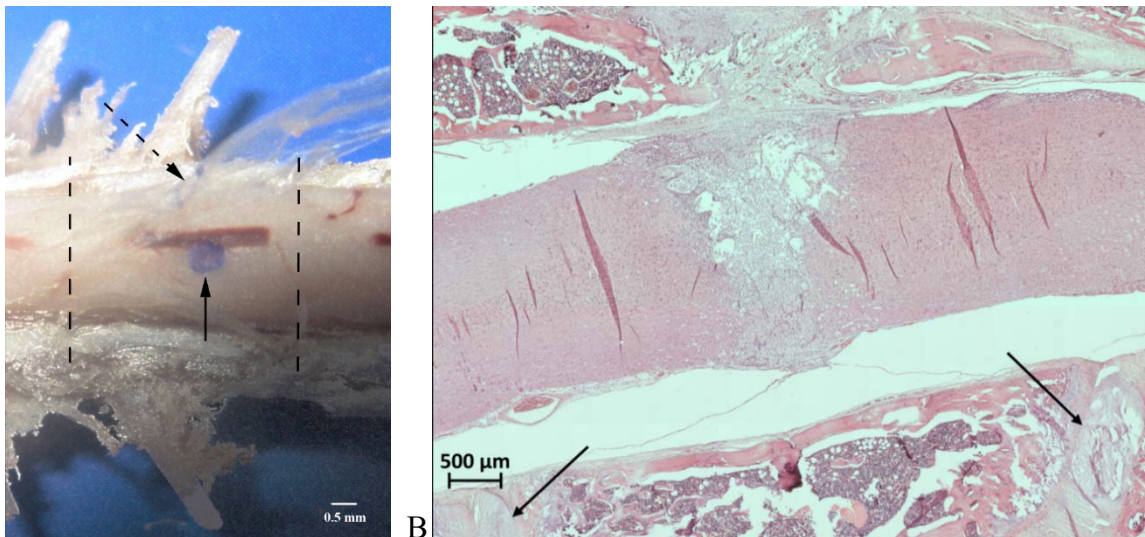

86

A

B

87 **Fig 2. The macro- and microscopic patterns of the damaged site of spinal cord.** A -  
88 sample of the spinal cord together with bone tissue. Defect of the spinal cord (solid arrow);  
89 cryoapplication zone on the dura mater (dotted arrow); margins of Th13 vertebra (dotted  
90 lines). Scale bar, 0,5 mm. B - sagittal section of Th13 vertebra after cryoapplication . The  
91 lesioned spinal cord within the projection of the approached vertebra. The upper and lower  
92 margins of T13 are shown by arrows. Scale bar, 500 μm.

93

94 During the first day after the cryoinjury, some typical signs of acute ischemic lesion were  
95 found in the affected area: tissue debris; massive microhemorrhages with a pronounced  
96 imbibition of the spinal cord tissues by fresh erythrocytes; few segmented neutrophils entering  
97 the site of necrosis; neutrophil margination and diapedesis in the vessels close to the necrotic  
98 zone.

99

### 100 **Subacute period after SCI**

101 In the early subacute stage (days 3-5 after the trauma), the cryodestruction site was  
102 characterized by well-defined boundaries separating it from the surrounding healthy tissue of the  
103 spinal cord. At day 3, noticeable hemorrhagic signs were still present in the cryodestruction site,

104 and clusters of segmented neutrophils were spread over the central and peripheral parts of the  
105 defect.

106 At this stage the area of necrosis was characterized by hypocellularity. In addition, a  
107 pronounced vascular response was noticed at the interface between the damaged and the intact  
108 spinal cord tissues. Individual macrophages (siderophages) were visualized at the defect margins  
109 on the side of the intact tissue, and erythrophagocytosis was also observed. In general, at this  
110 stage the activation of macrophages was relatively low.

111 Beginning from the fifth day following the injury, the spinal cord defect acquired its final  
112 geometric pattern of an «hour-glass» shape, expanding from the dorsal side and narrowing from  
113 the ventral side. The narrowed portion of this “hour-glass” corresponds to the anterior third of  
114 the spinal cord gray matter.

115 The cryodestruction site was characterized by the so-called «inhibition of leucocyte  
116 infiltration»: as a rule, very few, if any, segmented leucocytes were present in the lesioned area  
117 (Fig 3A). Some segmented neutrophils undergoing degradation were also detected.

118

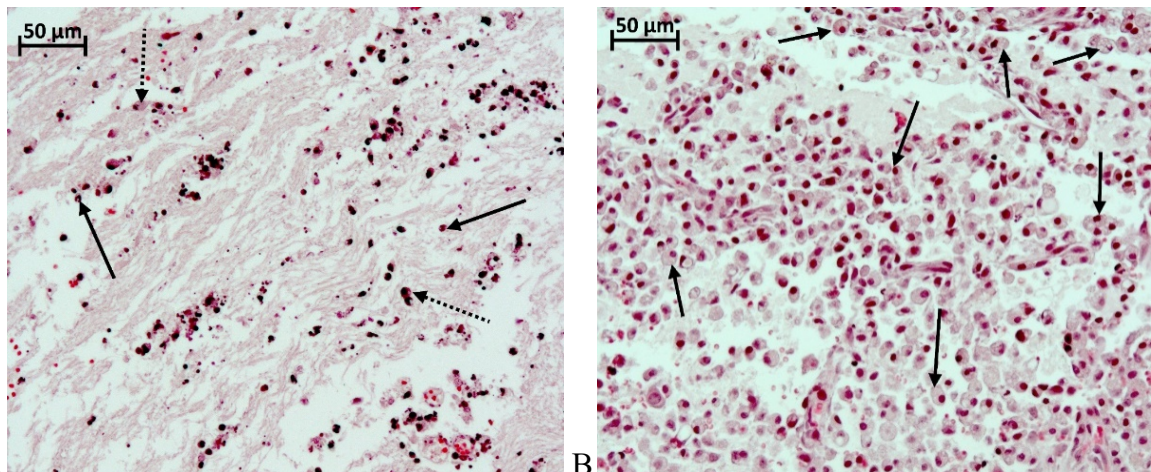

119 A B  
120 **Fig 3. The microscopic photos of fragment spinal cord at day 5 after the cryoinjury.**

121 A - Fragment of the central portion of the necrotic area. The «inhibition of leucocyte  
122 infiltration» with individual segmented leucocytes (solid arrows) versus few macrophages  
123 (dotted arrows). Small fragments of the decomposed segmented leucocytes are also visible in

124 the necrotic zone. B - Fragment of the peripheral part of the necrotic zone: multiple  
125 macrophages transforming into «grainy spheres» (solid arrows). H&E staining. Magnification  
126 200x.

127 At the same time, the periphery of the lesion area appears to be largely infiltrated by  
128 activated macrophages. They are beginning to transform into typically looking lipophage-like  
129 «grainy spheres» due to their lipid-rich cytoplasm composition (Fig 3B). During the above time  
130 span a peak vascular response was recorded in the peripheral zone of the defect. In addition,  
131 some initial manifestations of neoangiogenesis with an active role played by fibroblasts were  
132 evident at the peripheral portion of the defect. Some signs of the proliferation of endothelial cells  
133 were also noticed. Macrophages - transformed into siderophages - were involved in the active  
134 removal of late-stage hemorrhagic components.

135 At day 7 after the cryoinjury, macrophages were distributed evenly throughout the  
136 induced defect of the spinal cord (Fig 4A). On this day, the number of macrophages per unit in  
137 the area of necrosis reached its maximum value: 68 cells per field of vision of  $37500 \mu\text{m}^2$  (with  
138 400x magnification). Manifestations of erythrophagocytosis were present both in the central and  
139 peripheral parts of the necrotic zone.

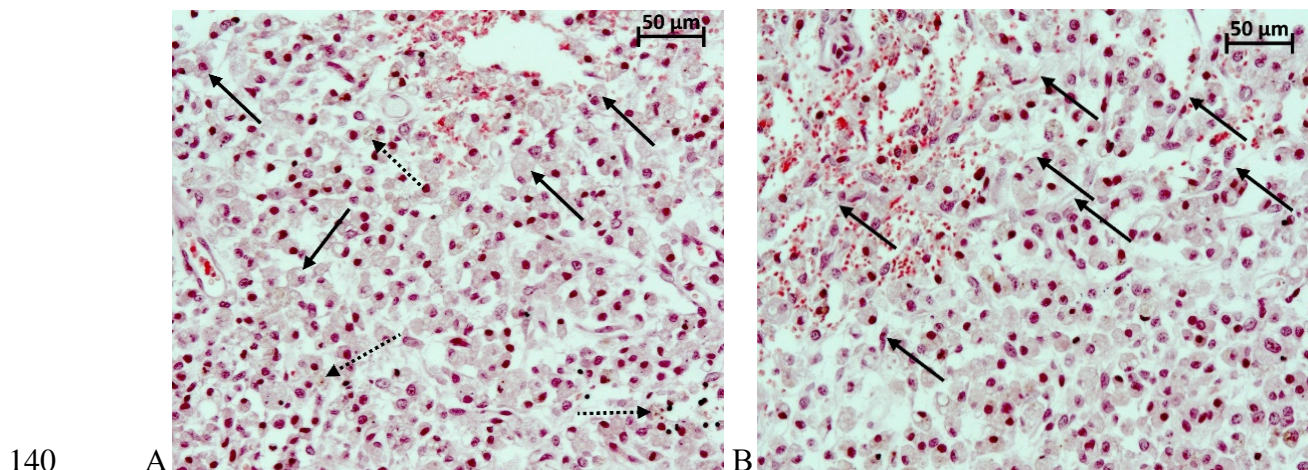

141 **Fig 4. The microscopic photos of fragment spinal cord at day 7 after the cryoinjury.** A -  
142 Fragment of the central part of the necrotic site: multiple macrophages transforming into  
143 «grainy spheres» and filling up the entire defect (solid arrows); multiple siderophages (dotted

144 arrows) reabsorb the late-stage hemorrhagic component in the necrotic site; on-going  
145 erythrophagocytosis process. B - Fragment of the peripheral part of the necrotic site in the rat  
146 spinal cord interfacing with the intact tissue: multiple thin-walled blood vessels with active  
147 proliferation of the endothelium (solid arrows). H&E staining, magnification 200x.

148

149 In the central and peripheral portions of the defect, the erythrocytes were scarce and their  
150 shape looked abnormal. A high activity of neoangiogenesis accompanied by active proliferation  
151 of endothelial cells was demonstrated at the margins of the necrotic area (Fig 4B). The average  
152 specific volume of vessels in the area of defect rose to  $0.0359 \text{ mm}^3/\text{mm}^3$ .

153 In the late subacute stage (days 10-14), there was a gradual decrease in the number of  
154 macrophages in the defect. In parallel, glial cells were emerging, the process of neoangiogenesis  
155 was progressing and the proportion of collagen fibers in the scar tissue was growing. As a rule,  
156 macrophages formed clusters suggesting that the phases of gliomesodermal scarring varied in  
157 different sections of the lesioned area. The newly formed vessels were found in the central part  
158 of the defect and their specific volume increased considerably, from  $0.0359$  to  $0.0504 \text{ mm}^3/$   
159  $\text{mm}^3$ . Histological structure of the vascular walls was gradually returning to its regular pattern.

160 At day 14 after the cryoinjury the macrophage percentage of the total cell population was  
161 still decreasing in the area of defect (to 43 cells per field of view of  $37500 \mu\text{m}^2$ ) (Fig 5A); the  
162 newly emerged multiple clusters of glial cells were spread unevenly throughout the area of  
163 defect (Fig 5B). The scar tissue was characterized by regular vascularization pattern and the  
164 blood vessels acquired a common histological organization.



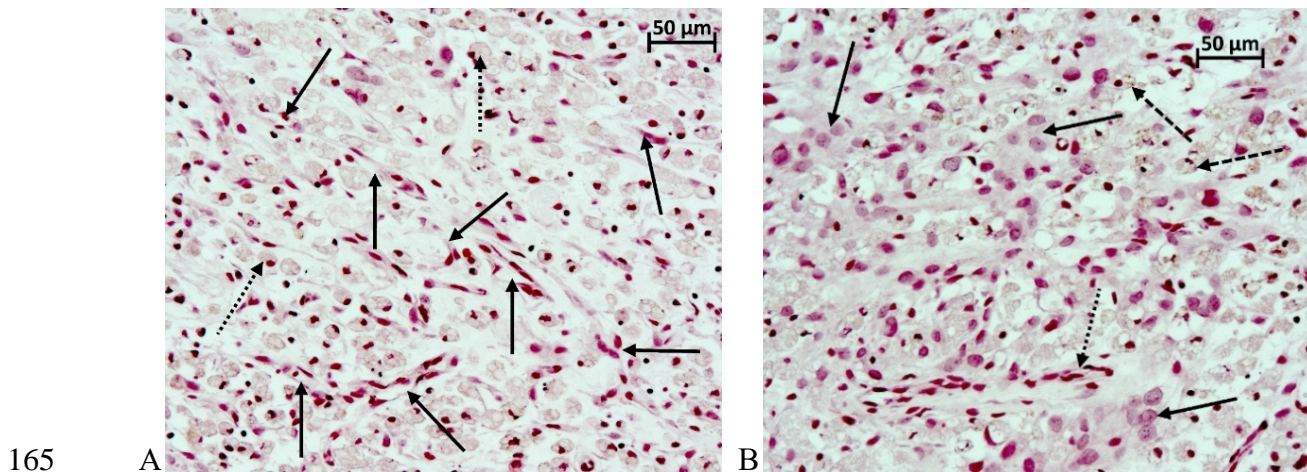

165 A B  
166 **Fig 5. The microscopic photos of fragment spinal cord at day 14 after the cryoinjury.** A -  
167 Fragment of the central part of the defect: further reduction of the number of macrophages in  
168 the overall population of cells in the lesion (dotted arrows). Multiple newly formed blood  
169 vessels (solid arrows). B - Fragment of the peripheral part of the defect: further decline of  
170 macrophages in the overall population of cells in the defect area (dashed arrows), the  
171 emergence of large glial cells (solid arrows). Newly formed blood vessels (dotted arrow).  
172 H&E staining, magnification 200x.

173  
174 By day 14, the average specific volume of blood vessels in the area of defect increased  
175 significantly and reached  $0.0725 \text{ mm}^3/\text{mm}^3$ . At day 14 the fibrous tissue component made a very  
176 low contribution to building the structure of gliomesodermal scar. At the same time, some  
177 artificial hollow spaces were found in the histological sections. The artificial hollow spaces  
178 developed as a result of the «fragility» and looseness of the defect site.

179 At day 21, the number of macrophages was still high and they were distributed evenly  
180 throughout the formed defect in the spinal cord (at the average 43 cells per field of view of  
181  $37500 \mu\text{m}^2$ ). However, their morphology and size varied within the same histological sections.  
182 Clusters of glial cells were visible in the peripheral zone of the defect. The size of fibrous tissue  
183 components in the entire structure of the gliomesodermal scar was noticeably increasing on day  
184 14, while the artificial hollow spaces in the sections were still present. It is worth noting that

185 already at this time span a trend to the development of cystic cavities in the site of cryoinjury  
186 was found in one of the experimental animals. Multiple newly formed blood vessels with an  
187 ordinary histological structure were visible all over the area. The average specific volume of  
188 blood vessels in the site of defect reached  $0.0807 \text{ mm}^3/\text{mm}^3$ .

189

### 190 **Chronic period after SCI**

191 By day 30 of the follow-up period, multiple macrophages were still present and  
192 distributed evenly throughout the site of defect of the spinal cord (averaging 46 cells per field of  
193 view of  $37500 \mu\text{m}^2$ ), whilst their morphology and size varied within the same histological  
194 sections (Fig 6A). It should be highlighted that at this time interval a trend to the development of  
195 cystic cavities in the site of cryoinjury was already traced in one of the experimental animals  
196 (Fig 6B).

197

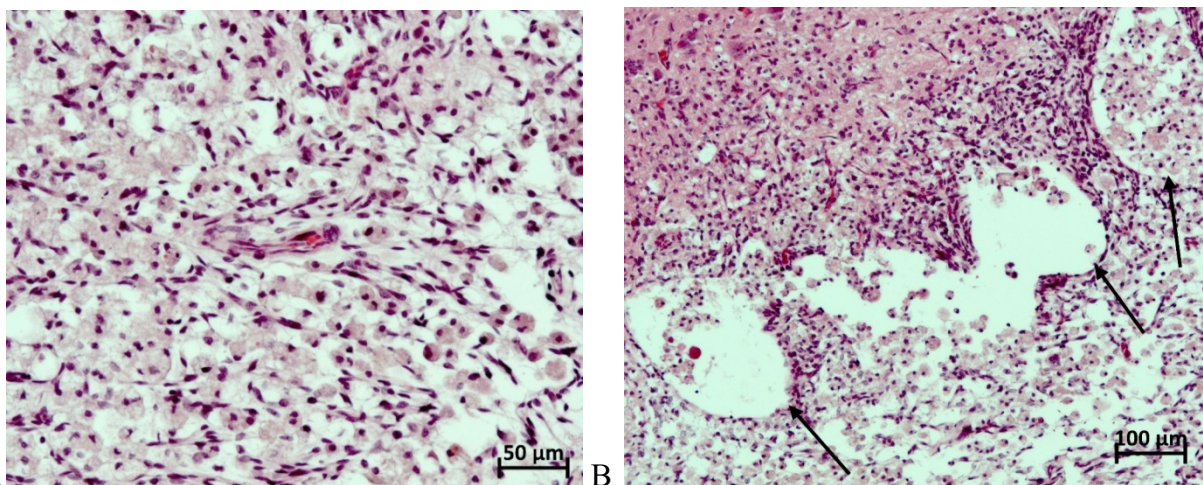

198

199 **Fig 6. The microscopic photos of fragment spinal cord at day 30 after the cryoinjury.** A -  
200 Fragment of the central part of the defect: plenty of macrophages distributed throughout the  
201 defect area on the background of multiple newly formed blood vessels. B - Fragment of the  
202 peripheral part of the necrotic zone in the rat spinal cord, interfacing with the intact tissue: a  
203 trend toward the formation of multiple small cystic cavities at the border between the defect

204 and the intact spinal cord, filled up mainly with macrophages. H&E staining, magnification  
205 200x.

206

207 The proportion of fibrous tissue component was increasing gradually in the structure of  
208 gliomesodermal scar, while the artificial hollow spaces were markedly less present in the  
209 histological sections than at days 14 and 21 after the cryoinjury. Multiple newly formed blood  
210 vessels with a normal histological structure were spread all over the examined areas. The average  
211 specific volume of blood vessels in the site of defect reached  $0.0878 \text{ mm}^3/\text{mm}^3$ .

212 Two months after the cryoinjury, in all animals the spinal cord defect contained large  
213 cystic cavities filled up with an amorphous substance which could reach the size of  $0.8 \text{ mm}^2$ . The  
214 share of fibrous tissue component in the entire structure of the gliomesodermal scar was rather  
215 low, the unevenly distributed fibers were undergoing different stages of maturity.

216 Cellularity in the area of defect was also non-homogeneous with a moderate macrophage-  
217 predominant pattern. Few glial cells and fibers are located at the defect margins (Fig 7A). By the  
218 end of the second month, multiple macrophages were still found but in a significantly reduced  
219 quantity (from 0 to 40 cells per field of view of  $37500 \mu\text{m}^2$ , averaging 21 cells) (Fig 7B). In the  
220 area of the spinal cord trauma the vascular system was well-developed and blood vessels  
221 acquired a normal histological structure.

222

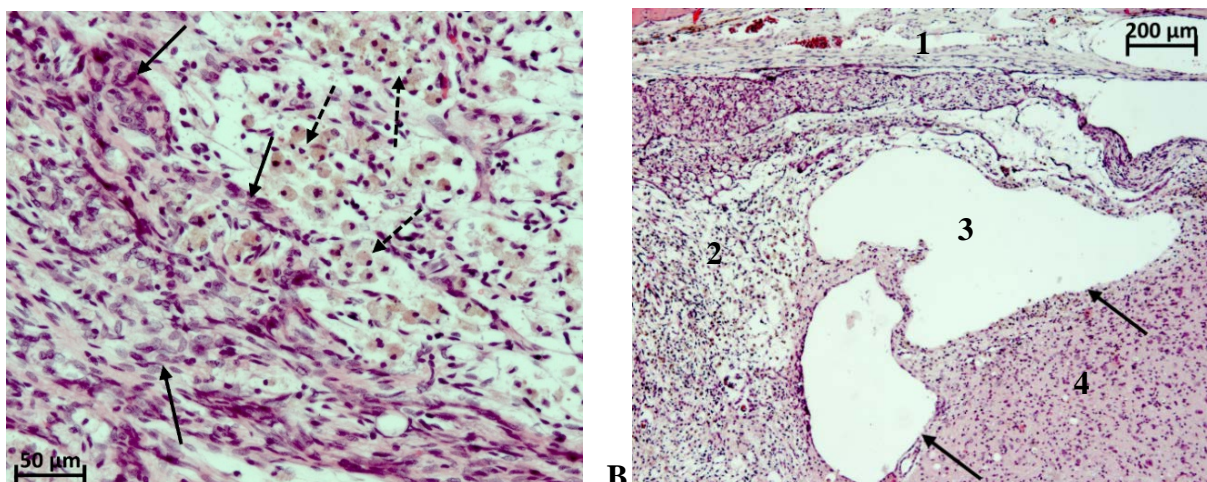

224 **Fig 7. The microscopic photos of fragment spinal cord at day 60 after the cryoinjury.** A -  
225 Fragment of the peripheral part of the defect: multiple macrophages (dotted arrows) on the  
226 background of glial cells and glial fibers. B - Fragment of the peripheral part of the necrotic  
227 zone, interfacing with the intact tissue: large cystic cavities at the border between the defect  
228 and the intact spinal cord (1 - Approach area, 2 - Defect of the spinal cord, 3 - Cystic cavities,  
229 4 - Intact spinal cord). H&E staining, magnification 200x.

230  
231 Figure 8 summarizes the timeline of changes in macrophage number and specific volume of  
232 blood vessels in the lesioned area of the assessed experimental material.

233

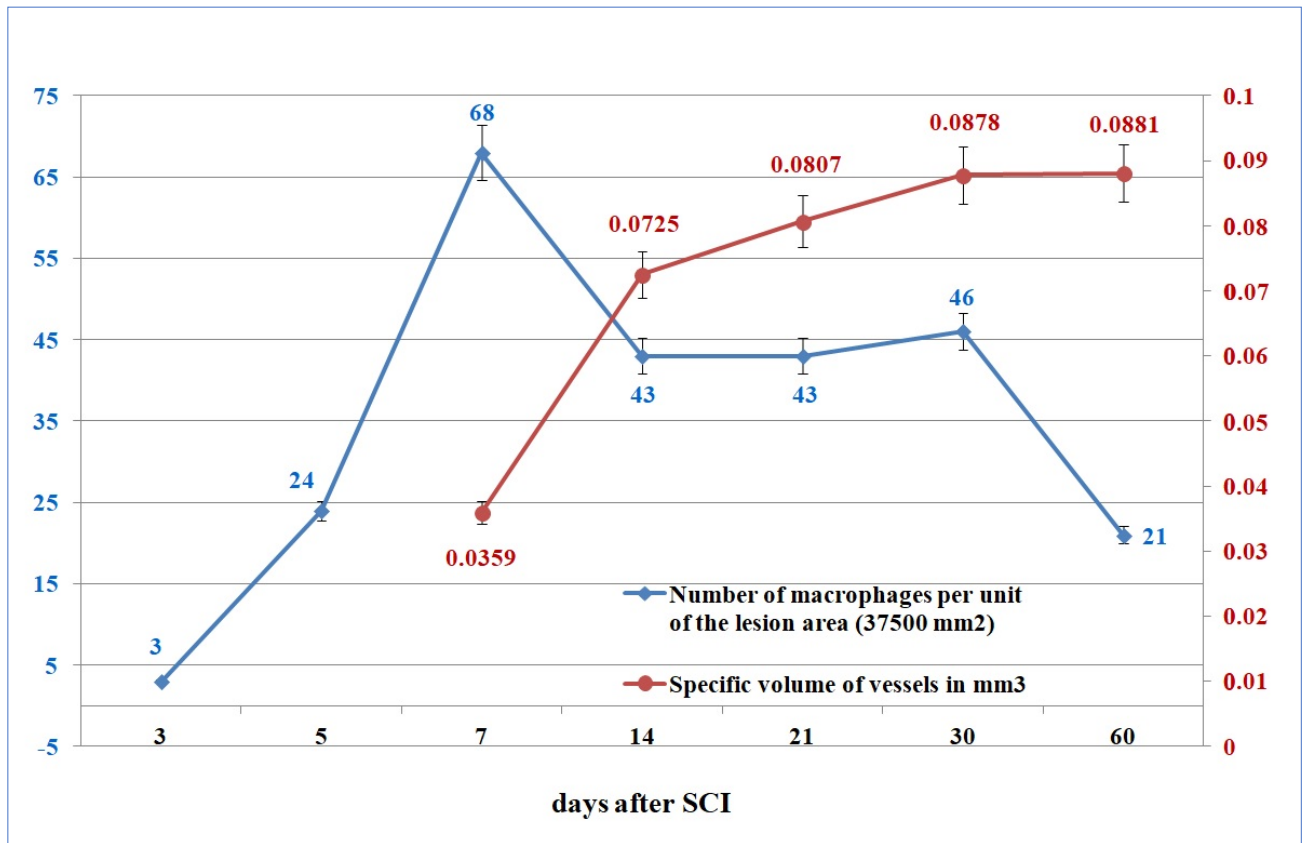

234  
235 **Fig 8. Changes in the numbers of macrophages and the volume of blood vessels in the**  
236 **cryolesion area in experimental rats.**

237

238 Impact of the cryoapplication on locomotor activity of rats was tested in the “open field”  
239 according to 21-score BBB Locomotor Rating Scale. Animals from the experimental group  
240 demonstrated stable monoplegia with abnormalities of locomotor functions at a mean 2.7 BBB  
241 score for 1 to 60 days. In the control group of animals where only surgical approach to the spinal  
242 cord was performed (without exposure to low temperatures), the full recovery of motor activity  
243 was reported much earlier – five days after the surgery (fig 9).  
244

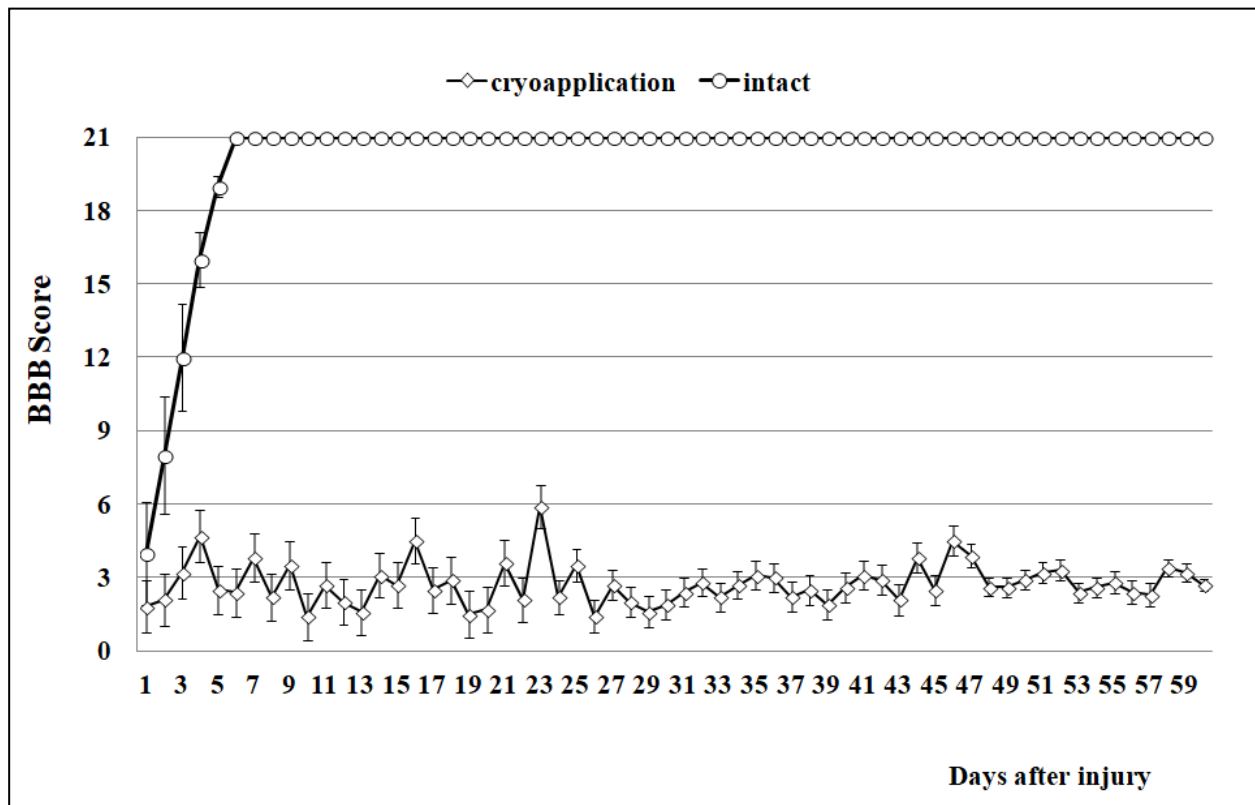

245  
246 **Fig 9. Mean BBB (Y axis) score of the rats over the course of 1 month follow-up (X axis)**  
247 **demonstrating minimal recovery typical for severe SCI.**

248  
249 **Discussion**

250 This histological study provided clear data on the time course of glial scar formation  
251 following a standardized cryoinjury of the rat spinal cord. In general, the observed scarring  
252 process showed an expected sequence of events. Histological findings demonstrated that the  
253 cryodestruction sites in serial sagittal sections were transmural, i.e. they encompassed the

254 dorsoventral arrangement of the spinal cord along its entire length. Formation of an «hourglass-  
255 shaped» spinal cord lesion (which appeared to be highly reproducible in multiple animals) with  
256 tissue necrosis was observed in the acute postinjury period. The spinal cord defect induced by  
257 cryoapplication comprises the right dorsal, right lateral and right ventral funiculi of spinal white  
258 matter, as well as the right dorsal and ventral horns of grey matter that ensures a stable  
259 monoplegia not followed by self-recovery. It is worth noting that the commonly used methods of  
260 SCI simulation do not meet this requirement [11, 14]. Current SCI models cause significant  
261 urinary system dysfunctions in rats, which is a serious drawback [14]. It is necessary to manually  
262 empty the bladder of the animals several times a day after injury to avoid bladder rupture and  
263 infectious inflammation [15-16]. Our model had no such drawback thanks to the minimal  
264 surgical injury. After injury, the animals retained their ability to naturally empty their bladder  
265 and intestines during the entire follow-up period despite the persistent monoplegia. The ability to  
266 urinate independently and defecate is the key to life support in the chronic postoperative period;  
267 it prevents the development of distress in rats and a nonspecific injury to the spinal cord when  
268 stimulating natural movements by palpation on the walls of the intestines and bladder through  
269 the abdominal wall of the animal.

270         The subacute period was characterized by the macrophage-mediated reabsorption of  
271 necrotic tissue. This process was followed by local neoangiogenesis and ultimately resulted in  
272 the development of mesodermal-glial scarring tissue and the formation of cysts. For the first  
273 time, macrophages appeared at the peripheral portion of the defect on day 3 and demonstrated an  
274 exponential growth by day 7. However, their number reduced by day 14 and reached a plateau at  
275 which it stayed at least by the end of the first month of follow-up period. It should be pointed out  
276 that at day 60 multiple macrophages were still present in the defect site. These findings definitely  
277 prove that rearrangement processes occur continuously in the process of maturation of a glial  
278 scar [12, 17]. Neoangiogenesis in the peripheral portion of the defect was already noticeable by  
279 day 5. The newly formed blood vessels begin to acquire normal histological features by day 14

280 of follow-up period; their specific volume demonstrates an exponential progression and reaches  
281 plateau by day 30. An adequate nutrition of the forming scar is crucial at the early stages. But it  
282 is equally important that the newly formed blood vessels keep functioning at the late stages of  
283 maturation of a glial scar [12, 18]. In our opinion, quantitative and especially qualitative  
284 indicators of the pass-through capacity of newly formed blood vessels may be considered as key  
285 predictors of the effectiveness of repair processes in nerve tissue. Thus, our future research will  
286 be dedicated to neoangiogenesis and characterization of vascular networks in the scar tissue.

287 Thus, the present model can be used as an efficient and reliable experimental simulation  
288 of glial scarring in the posttraumatic period. It is also noteworthy that the spinal cord lesions  
289 were usually characterized by high reproducibility and significantly decreased interanimal  
290 variability. According to BBB score, most of the rats with simulated post-traumatic scar of the  
291 spinal cord developed monoplegia at the affected side persisting for 60 days. In this context, the  
292 proposed model looks even more interesting and can be used for a reliable assessment of the  
293 process of post-SCI glial scar formation. In addition, it could be recommended for testing  
294 potential therapeutic solutions.

295 However, it is obvious that the proposed model does not represent the scenario of  
296 pathophysiologic events of spinal trauma that typically occur in the clinical setting. For the  
297 reproduction of clinical cases the researchers usually use other well-known experimental SCI  
298 models that cause a blunt trauma.

299 But we would like to re-emphasize that this model is focused on the issue of  
300 posttraumatic glial scarring, one of the most critical consequences of spinal trauma, for the  
301 management of which no successful therapeutic solutions have been found so far [19-21]. The  
302 model proposed in this study offers a reliable and standardized simulation of the spinal cord  
303 lesion and highlights the time course of posttraumatic changes. Thus, it can serve as an optimal  
304 platform for studying the efficacy of potential therapeutic solutions targeted at preventing the  
305 formation of glial scar in the posttraumatic period.

306

## 307 **Conclusion**

308 The described model of standardized post-traumatic spinal cord glial scarring demonstrated that  
309 there was a specific course of histological changes. It can be used as a reliable experimental  
310 model for testing therapeutic solutions that prevent posttraumatic glial scarring.

311

## 312 **Methods**

313 **Laboratory animals.** Male SD rats of SPF-category (n=36) weighing 320–360 g were used in  
314 the experiment to ensure an adequate, convenient visualization and identification of all  
315 anatomical structures while performing the surgical procedure. The animals were kept under  
316 standard housing conditions at the Animal Breeding Facility of the Branch of the Institute of  
317 Bioorganic Chemistry (unique scientific unit «Bio-model» IBCh RAS). All animals  
318 manipulations were approved by the Institutional Animal Care and Use Committee of the BIBCh  
319 (Protocol No. 718/19 of 01/10/19).

320

321 **Preoperative preparation and anesthetic support.** The animals were placed in cages with  
322 clean bedding and water 24 h before the surgery. The surgical procedure was performed under  
323 general anesthesia with Aerrane (Baxter Healthcare Corp., USA) on a temperature-controlled  
324 operating table (+38°C). A single intramuscular injection of Baytril (enrofloxacin, 25 mg/mL)  
325 was administered at the dosage of 10 mg/kg. Premedication was not used. Blood pressure and  
326 vital parameters were continually monitored and the surgical procedure was carried out under  
327 strictly controlled aseptic conditions.

328

329 **Surgical approach and cryoapplication.** The surgical technique was described in detail in  
330 previous papers [22-23]. Briefly, unilateral laminectomy of Th13 vertebra was performed with a  
331 dental burr and cryoinjury was induced using an original device. The spinal cords of the



332 experimental animals were cooled by applying a cryoconductor through the dura mater. In the  
333 area of contact with the biological substrate, the copper conductor was 0.8 mm in diameter. The  
334 distance from the cold source - liquid nitrogen - was 9 cm, and the cryoapplication procedure  
335 lasted for 1 min. In the contact area the local temperature reached minus 20°C.

336

337 **Postoperative monitoring.** Animals were euthanized at various time intervals following the  
338 cryoinjury: in the acute (first 24 hours after the injury) subacute (days 3, 5, 7, 10, 14), and  
339 chronic period (days 21, 30, 60) (4 animals at each time interval). The present SCI protocol and  
340 clinical monitoring ensured a 100% survival rate of the experimental animals. In particular, no  
341 infectious complications were reported.

342

343 **Assessment of locomotor activity.** Locomotor activity of rats was tested prior to surgery, and  
344 every day after injury for 60 days. Two independent observers who were blinded to the treatment  
345 methods and groups performed Basso, Beattie and Bresnahan (BBB) scoring in an open field test  
346 [24]. These tests included 4 rats per group and were conducted to evaluate the restoration of  
347 hindlimb locomotor function after SCI. For the BBB scoring, the rats were individually placed in  
348 an open area with a non-slippery surface and allowed to move freely for 5 min. Two observers  
349 evaluated locomotion during open-field walking and scored the hindlimb performance according  
350 to the BBB scale in which scores range from 0 (no movement) to 21 (normal movement).

351

352 **Histological methods.** Samples of the rat injured spinal cord were removed “en bloc” together  
353 with three vertebrae (the vertebra of the surgical approach – Th13, and two adjacent vertebrae –  
354 Th12 and L1). They were fixed in 10% neutral buffered formalin solution for 2-5 days, rinsed in  
355 running tap water and processed for decalcification in Trilon B at a room temperature for 12-16  
356 days.

357 As soon as a satisfactory decalcification was achieved, the specimens were cut and cleaned of  
358 soft tissues, and the biomaterial was oriented for further microtomy in the sagittal plane. The cut  
359 specimens were rinsed in running tap water, dehydrated in an ascending alcohol series and  
360 embedded in paraffin. Microtomy of the specimens was performed in the sagittal plane, in series  
361 with a sectioning step size of 200  $\mu\text{m}$ .

362 Hematoxylin and eosin (H&E) as well Heidenhain's azocarmine were used for staining serial 4-  
363 5- $\mu\text{m}$ -thick paraffin sections. A series of sections in the sagittal plane was prepared for  
364 morphological measurements, and the section with the largest defect area was selected. The  
365 topography of affected structures of the spinal cord was assessed according to «A high-resolution  
366 anatomical rat atlas» [25].

367 In order to improve visualization of the spinal cord defect and to assist with preparing  
368 histological sections, a methylene blue 0.1% solution (HiMedia Laboratories, India) was used.  
369 After the animals were euthanized and the spinal cord within the bone fragment was extracted,  
370 100  $\mu\text{l}$  of dye were added to the laminectomy window. As a result, an intense blue staining of the  
371 defect area was achieved.

372 Then, the sections were examined by ordinary light microscopy using Zeiss Axio Scope A1  
373 microscope (Carl Zeiss, Germany). Microphotographs of the histological sections were made  
374 with AxioCam 305 color high-speed camera (Carl Zeiss, Germany), and morphometric  
375 measurements were processed with ZEN 2.6 lite software (Carl Zeiss, Germany). The obtained  
376 data relating to the number macrophages and the volume of blood vessels were processed using  
377 a statistical software package SigmaPlot statistic (v. 13.0).

378

## 379 **References**

- 380 1. Nas K, Yazmalar L, Şah V, Aydın A, Öneş K Rehabilitation of spinal cord injuries.  
381 World J Orthop 2015; 18(6): 8–16. <http://doi.org/10.5312/wjo.v6.i1.8>
- 382 2. Wang H, Song G, Chuang H, Chiu C, Abdel Maksoud A, Ye Y et al. Portrait of glial scar  
383 in neurological diseases. Int J Immunopathol Pharmacol 2018; 31.  
384 e2058738418801406. <http://doi.org/10.1177/2058738418801406>
- 385 3. Ribotta MG, Menet V, Privat A Glial scar and axonal regeneration in the CNS: lessons  
386 from GFAP and vimentin transgenic mice. Acta Neurochir Suppl 2004; 89: 87-92.  
387 [http://doi.org/10.1007/978-3-7091-0603-7\\_12](http://doi.org/10.1007/978-3-7091-0603-7_12)
- 388 4. King VR, Alovskaya A, Wei DY, Brown RA, Priestley JV The use of injectable forms  
389 of fibrin and fibronectin to support axonal ingrowth after spinal cord injury.  
390 Biomaterials 2010; 31: 4447–4456. <http://doi.org/10.1016/j.biomaterials.2010.02.018>
- 391 5. Wei Y., He Y., Xu C., Wang Y., Liu B., Wang X. et al. Hyaluronic acid hydrogel  
392 modified with nogo-66 receptor antibody and poly-L -lysine to promote axon regrowth  
393 after spinal cord injury. J Biomed Mater Res B. Appl Biomater 2010; 95: 110–117.  
394 <https://doi.org/10.1002/jbm.b.31689>
- 395 6. Angeli CA, Boakye M, Morton RA, Vogt J, Benton K, Chen Y et al. Recovery of over-  
396 ground walking after chronic motor complete spinal cord injury. N Engl J Med 2018;  
397 379: 1244-1250. <https://doi.org/10.1056/NEJMoa1803588>
- 398 7. Jiao G, Pan Y, Wang C, Li Z, Li Z, Guo R A bridging SF/Alg composite scaffold  
399 loaded NGF for spinal cord injury repair. Mater Sci Eng C Mater Biol Appl 2017a; 76:  
400 81–87. <https://doi.org/10.1016/j.msec.2017.02.102>
- 401 8. Jiao G, Lou G, Mo Y, Pan Y, Zhang Z, Guo R et al. A combination of GDNF and  
402 hUCMSC transplantation loaded on SF/AGs composite scaffolds for spinal cord injury  
403 repair. Mater Sci Eng C Mater Biol Appl 2017b; 74: 230–237.  
404 <https://doi.org/10.1016/j.msec.2016.12.017>
- 405 9. Minakov AN, Chernov AS, Asutin DS, Konovalov NA, Telegin GB Surgical  
406 Simulation of a Posttraumatic Spinal Cord Glial Scar in Rats. Acta Naturae 2018; 10(3):  
407 4-10. <https://doi.org/10.32607/20758251-2018-10-3-4-10>
- 408 10. Mills CD, Grady JJ, Hulsebosch CE Changes in exploratory behavior as a measure of  
409 chronic central pain following spinal cord injury. J Neurotrauma 2001; 18: 1091–1105.  
410 <https://doi.org/10.1089/08977150152693773>
- 411 11. Verma R, Virdi JK, Singh N, Jaggi AS Animals models of spinal cord contusion injury.  
412 Korean J Pain 2019; 32: 12–21. <https://doi.org/10.3344/kjp.2019.32.1.12>

- 413 12. Bradbury EJ, Burnside ER Moving beyond the glial scar for spinal cord repair. *Nat*  
414 *Commun* 2019; 10: 3879. <https://doi.org/10.1038/s41467-019-11707-7>
- 415 13. Minakov A, Chernov A, Sirotkin A, Asutin D, Konovalov N, Telegin G Surgical model  
416 of spinal cord injury in rats. *Lab Animals* 201; 53(1S): 130.  
417 <https://doi.org/10.1177/0023677219839199>
- 418 14. Krishna V, Andrews H, Jin X, Yu J, Varma A, Wen X, Kindy MA *J Vis Exp* 2013; 78:  
419 e50111. <https://doi.org/10.3791/50111>
- 420 15. David BT, Steward O *Exp Neurol* 2010; 226(1): 128–135.  
421 <https://doi.org/10.1016/j.expneurol.2010.08.014>
- 422 16. Wada N, Shimizu T, Takai S, Shimizu N, Kanai AJ, Tyagi P et al. Post-injury bladder  
423 management strategy influences lower urinary tract dysfunction in the mouse model of  
424 spinal cord injury. *Neurourol Urodyn* 2017; 36(5): 1301–1305.  
425 <https://doi.org/10.1002/nau.23120>
- 426 17. Yang T, Dai YJ, Chen G, Cui SS Dissecting the dual role of the glial scar and scar-  
427 forming astrocytes in spinal cord injury. *Front Cell Neurosci* 2020; 14: 78.  
428 <https://doi.org/10.3389/fncel.2020.00078>
- 429 18. Huang L, Nakamura Y, Lo EH Hayakawa K Astrocyte signaling in the neurovascular  
430 unit after central nervous system injury. *Int J Mol Sci.* 2019; 20(2): 282.  
431 <https://doi.org/10.3390/ijms20020282>
- 432 19. Orlandin JR, Ambrósio CE, Lara VM Glial scar-modulation as therapeutic tool in spinal  
433 cord injury in animal models. *Acta Cir Bras* 2017; 32(2): [https://doi.org/10.1590/s0102-](https://doi.org/10.1590/s0102-865020170209)  
434 [865020170209](https://doi.org/10.1590/s0102-865020170209)
- 435 20. Lee JS, Hsu YH, Chiu YS, Jou IM, Chang MS Anti-IL-20 antibody improved motor  
436 function and reduced glial scar formation after traumatic spinal cord injury in rats. *J*  
437 *Neuroinflammation* 2020; 17(156). <https://doi.org/10.1186/s12974-020-01814-4>
- 438 21. Chen C, Yang Q, Ma X. Synergistic effect of ascorbic acid and taurine in the treatment  
439 of a spinal cord injury-induced model in rats. *Biotech* 2020; 10(2).  
440 <https://doi.org/10.1007/s13205-019-2032-x>
- 441 22. Harikrishnan VS, Krishnan LK, Abelson KS A novel technique to develop thoracic  
442 spinal laminectomy and a methodology to assess the functionality and welfare of the  
443 contusion spinal cord injury (SCI) rat model. *PLoS One* 2019; 14(7): e0219001.  
444 <https://doi.org/10.1371/journal.pone.0219001>
- 445 23. Telegin GB, Minakov AN, Chernov AS, Manskikh VN, Asyutin DS, Konovalov NA,  
446 Gabibov AG Surgical Simulation of a Posttraumatic Spinal Cord Glial Scar in Rats.  
447 *Acta Nature* 2019; 11: 75-81. <https://doi.org/10.32607/20758251-2019-11-3-75-81>

- 448 24. Basso DM, Beattie MS, Bresnahan JC A sensitive and reliable locomotor rating scale  
449 for open field testing in rats. J Neurotrauma 1995; 12(1): 1-21.  
450 <https://doi.org/10.1089/neu.1995.12.1>
- 451 25. Bai X, Yu L, Liu Q, Zhang J, Li A, Han D et al. A high-resolution anatomical rat atlas. J  
452 Anat 2006; 209(5): 707–708. <https://doi.org/10.1111/j.1469-7580.2006.00645.x>

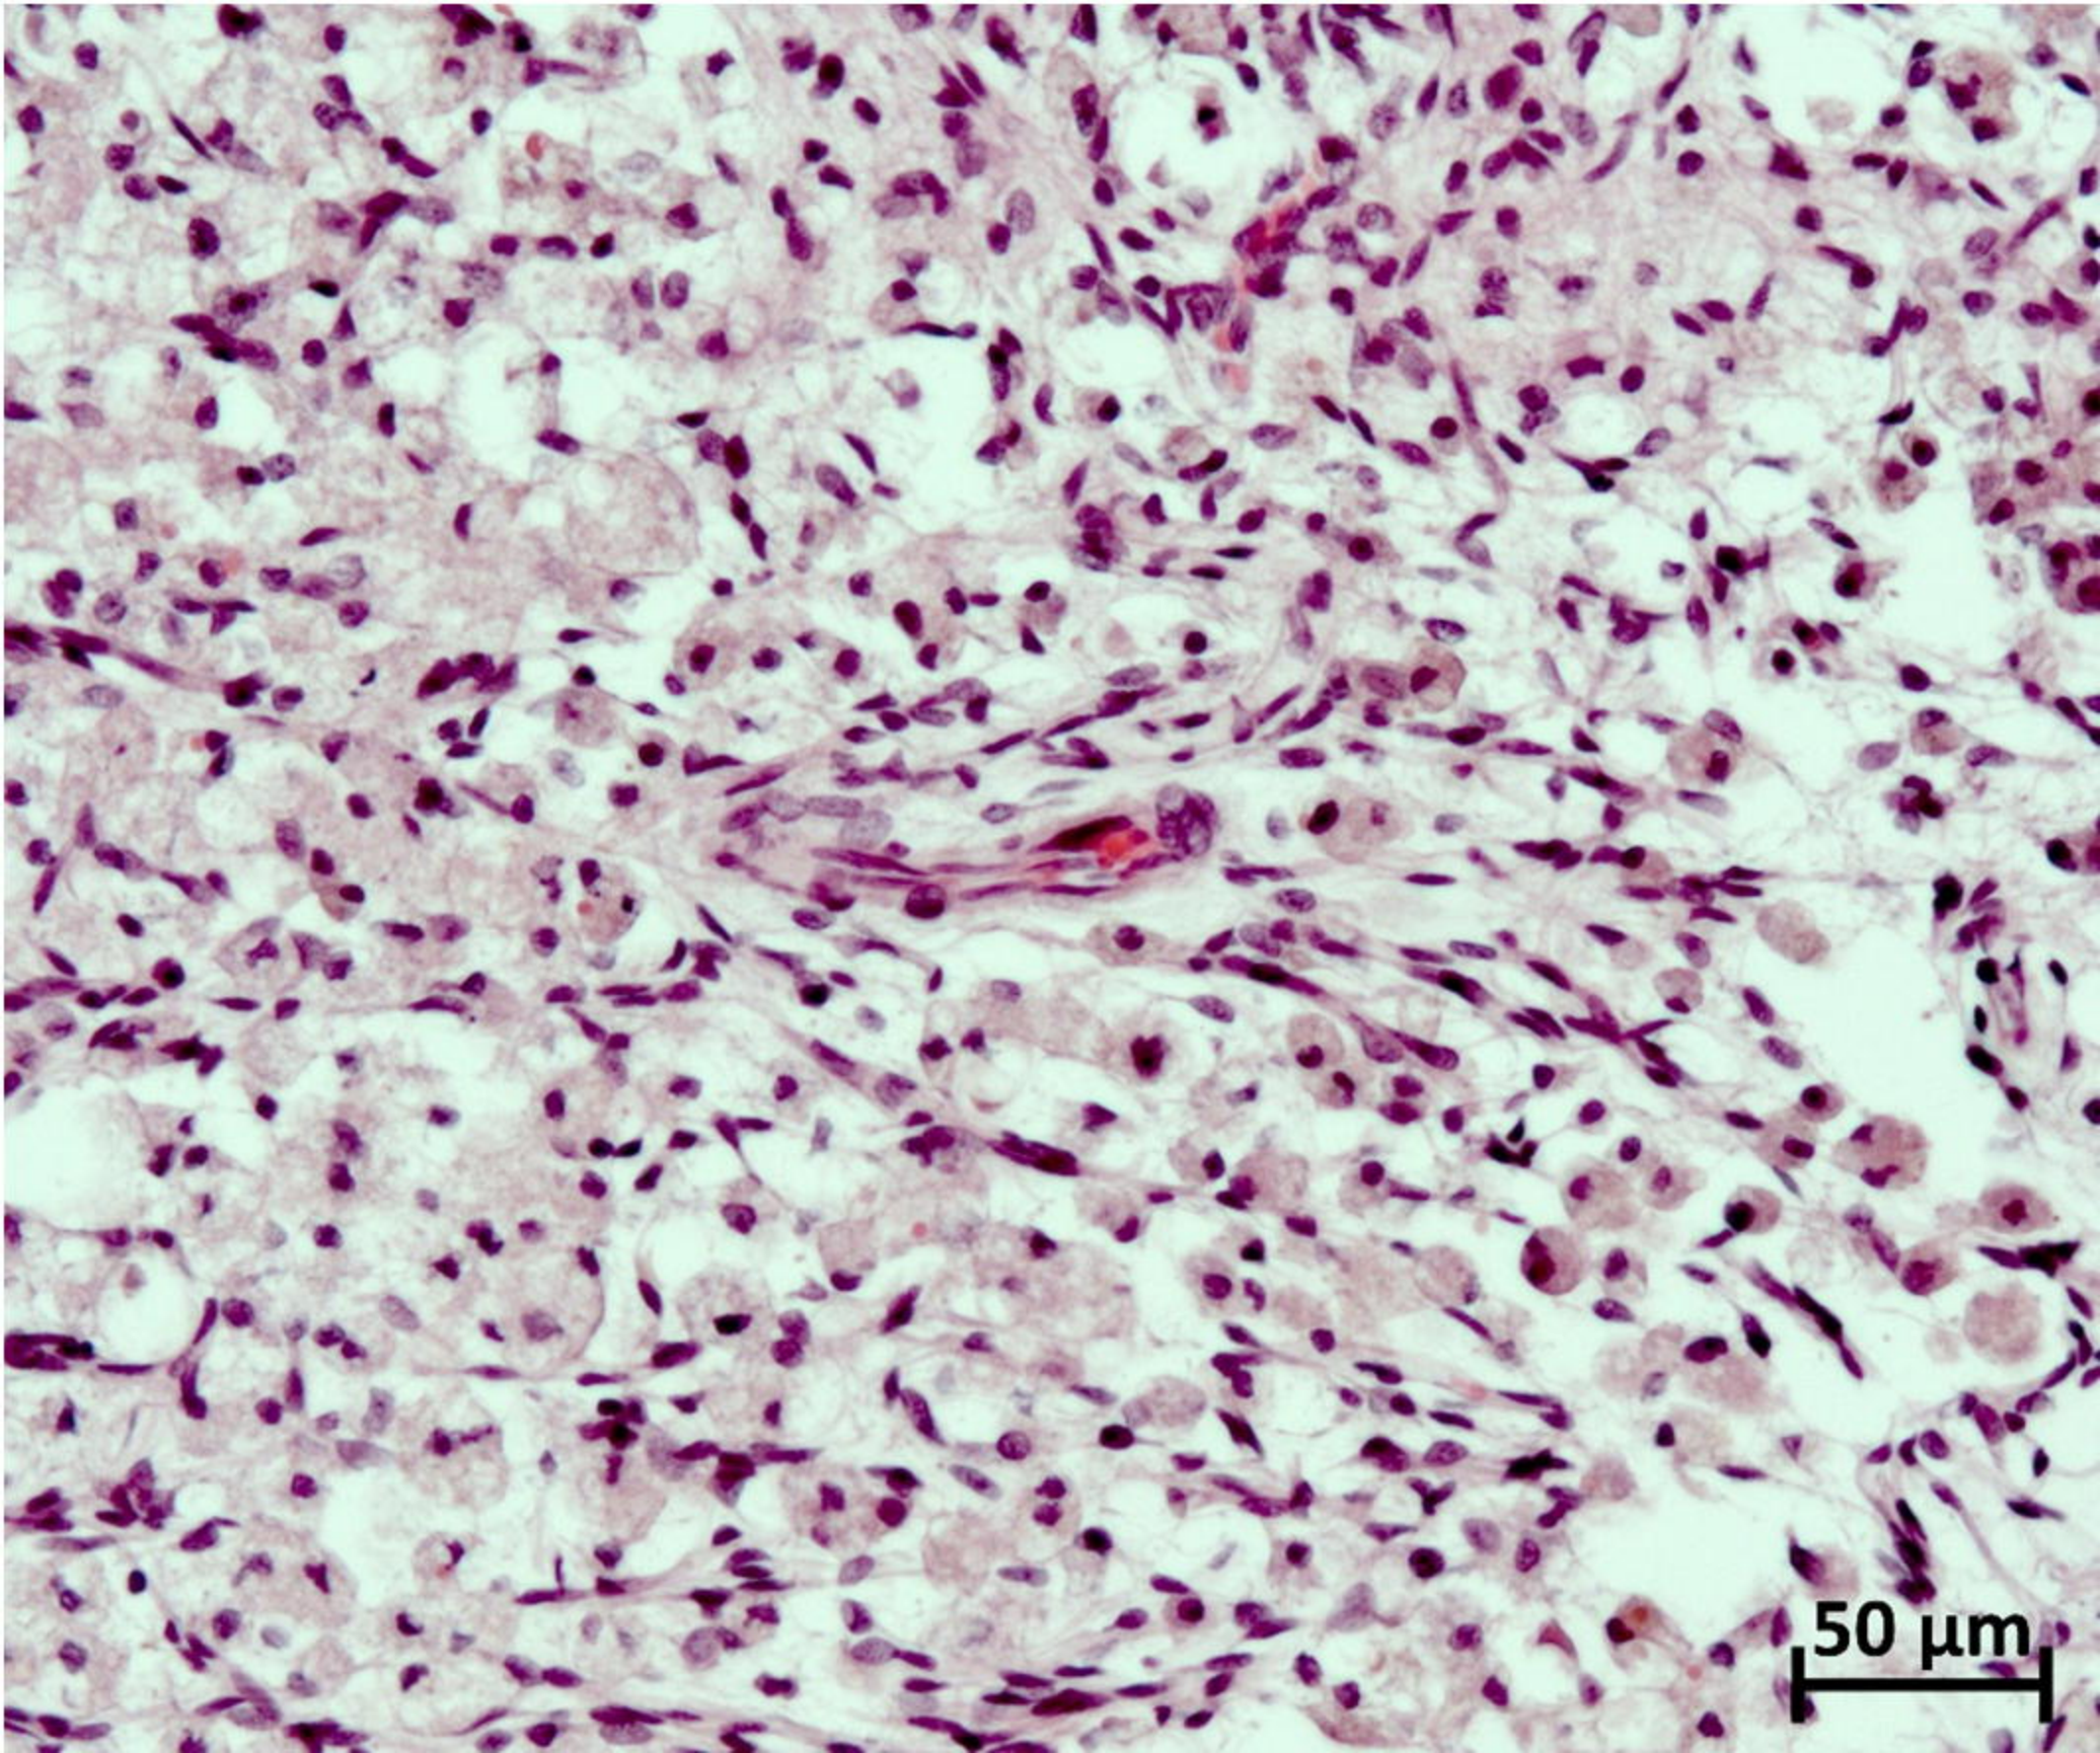

50  $\mu\text{m}$

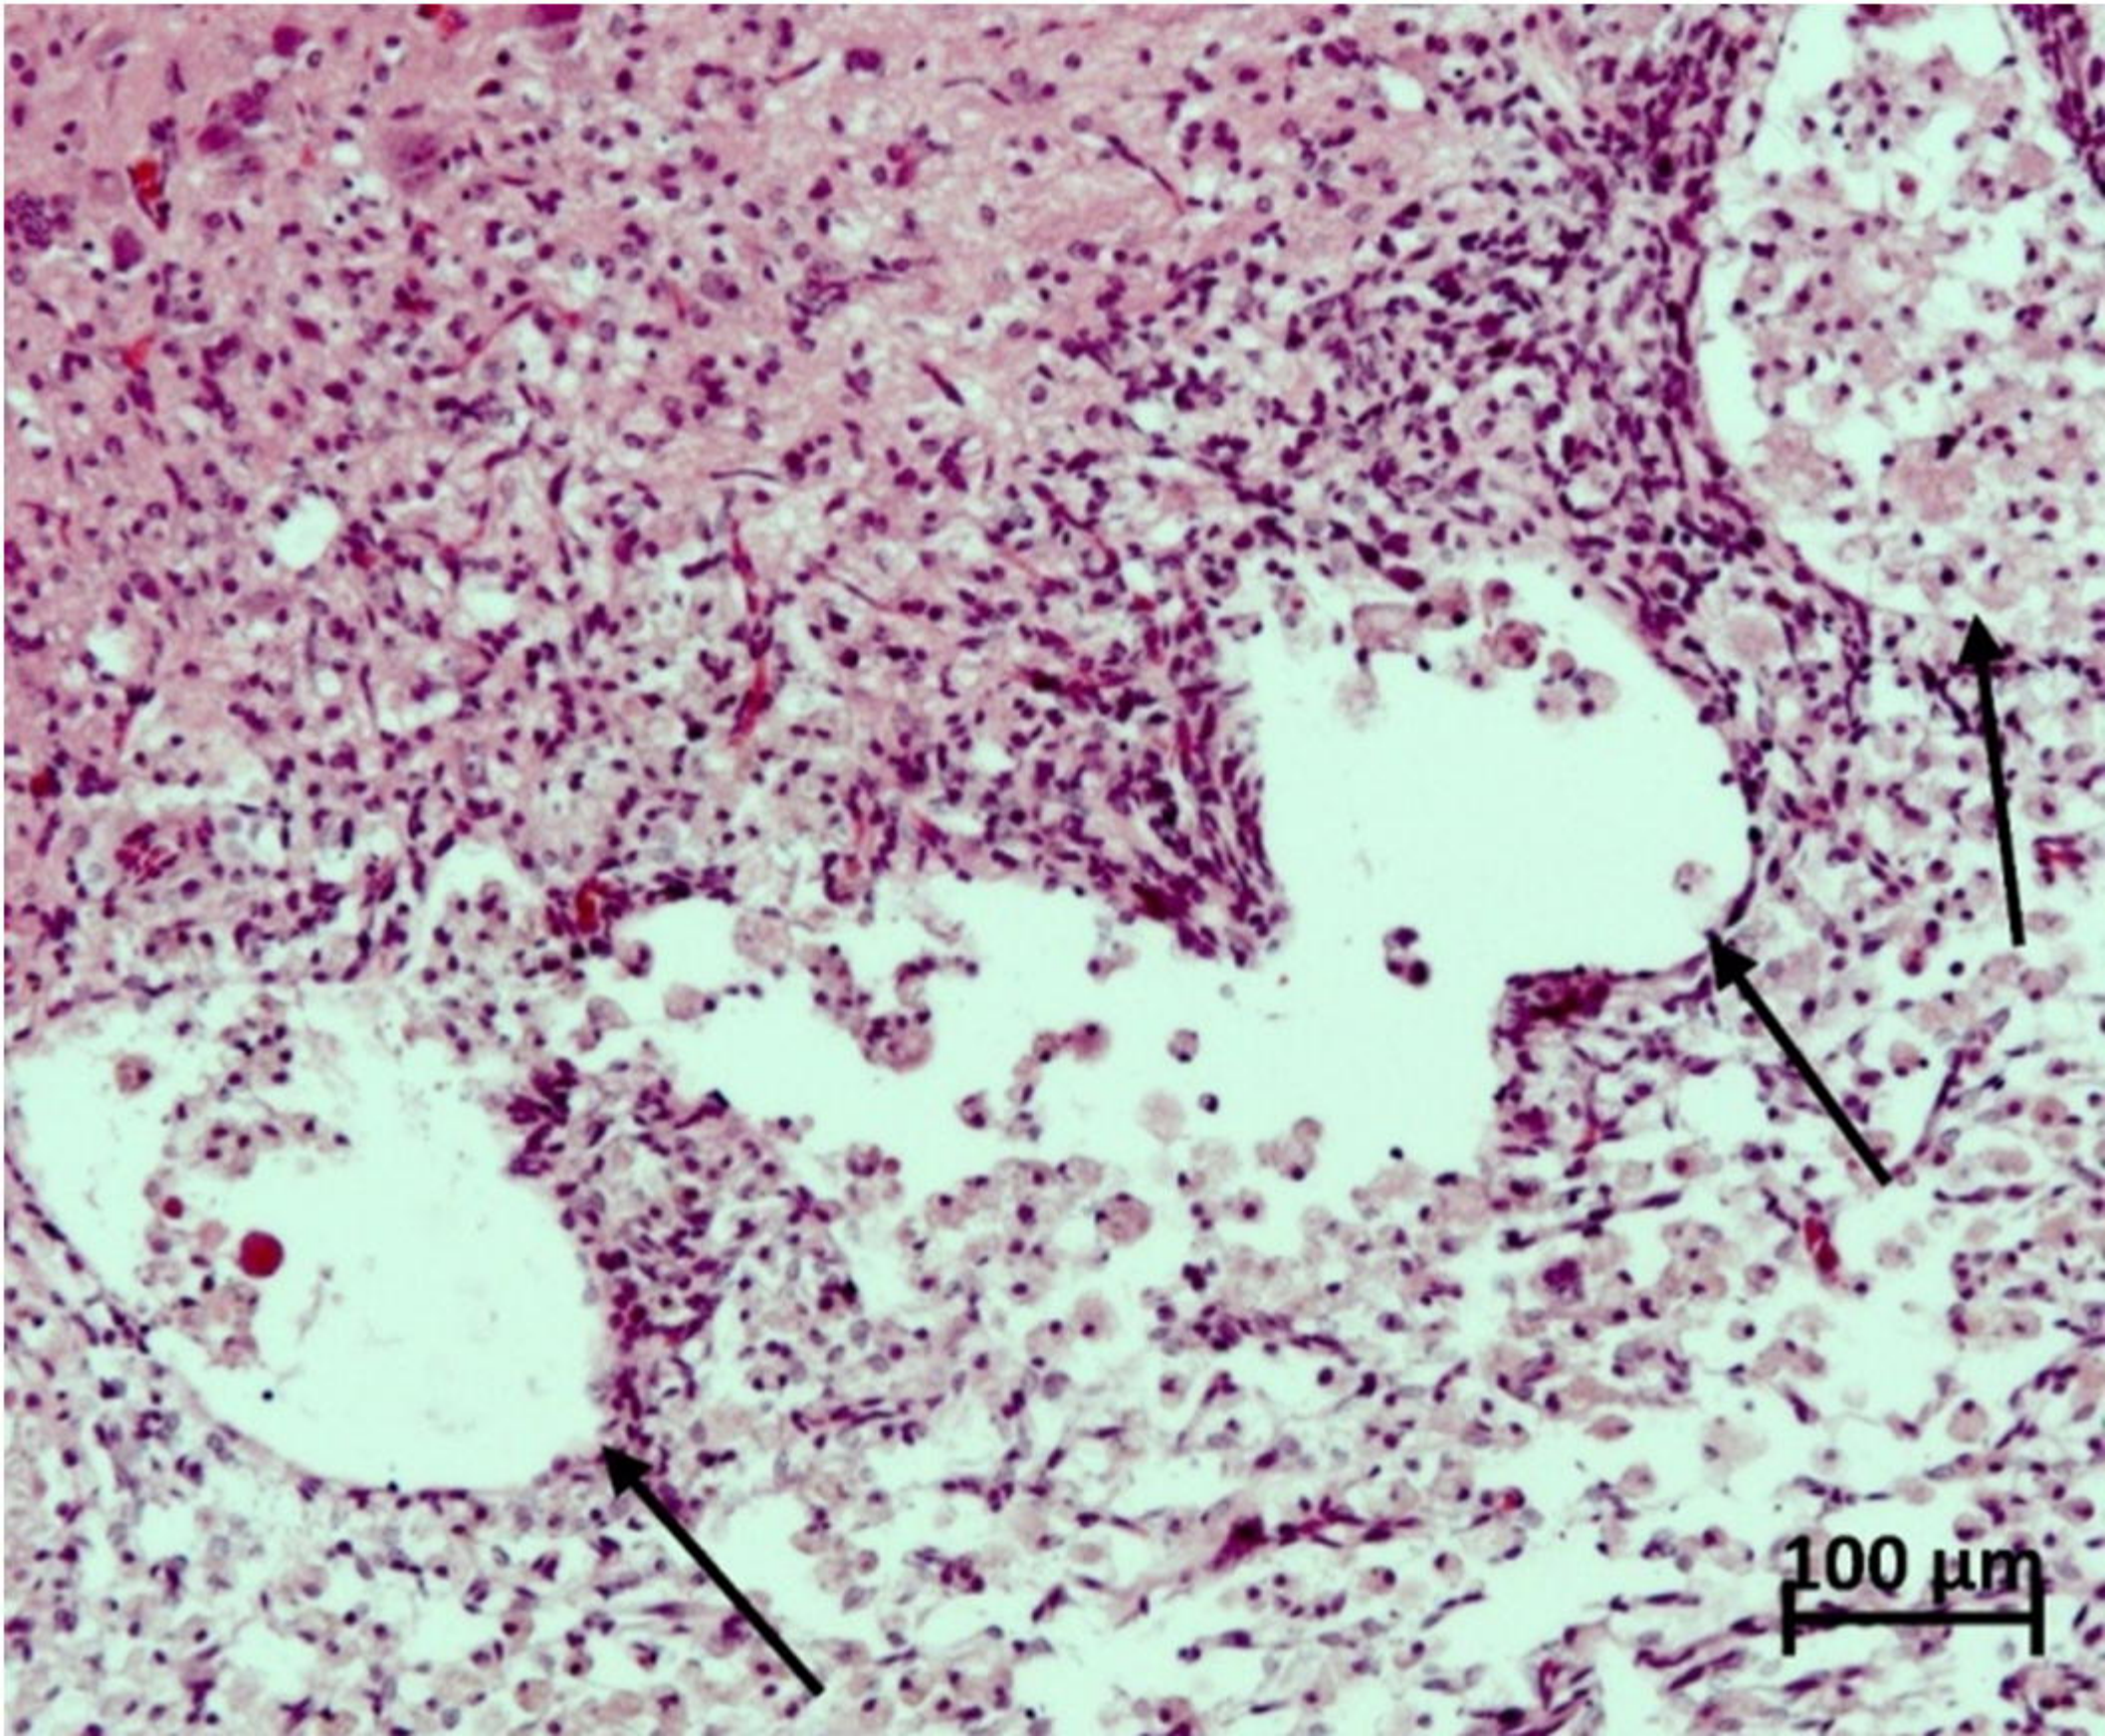

100 μm

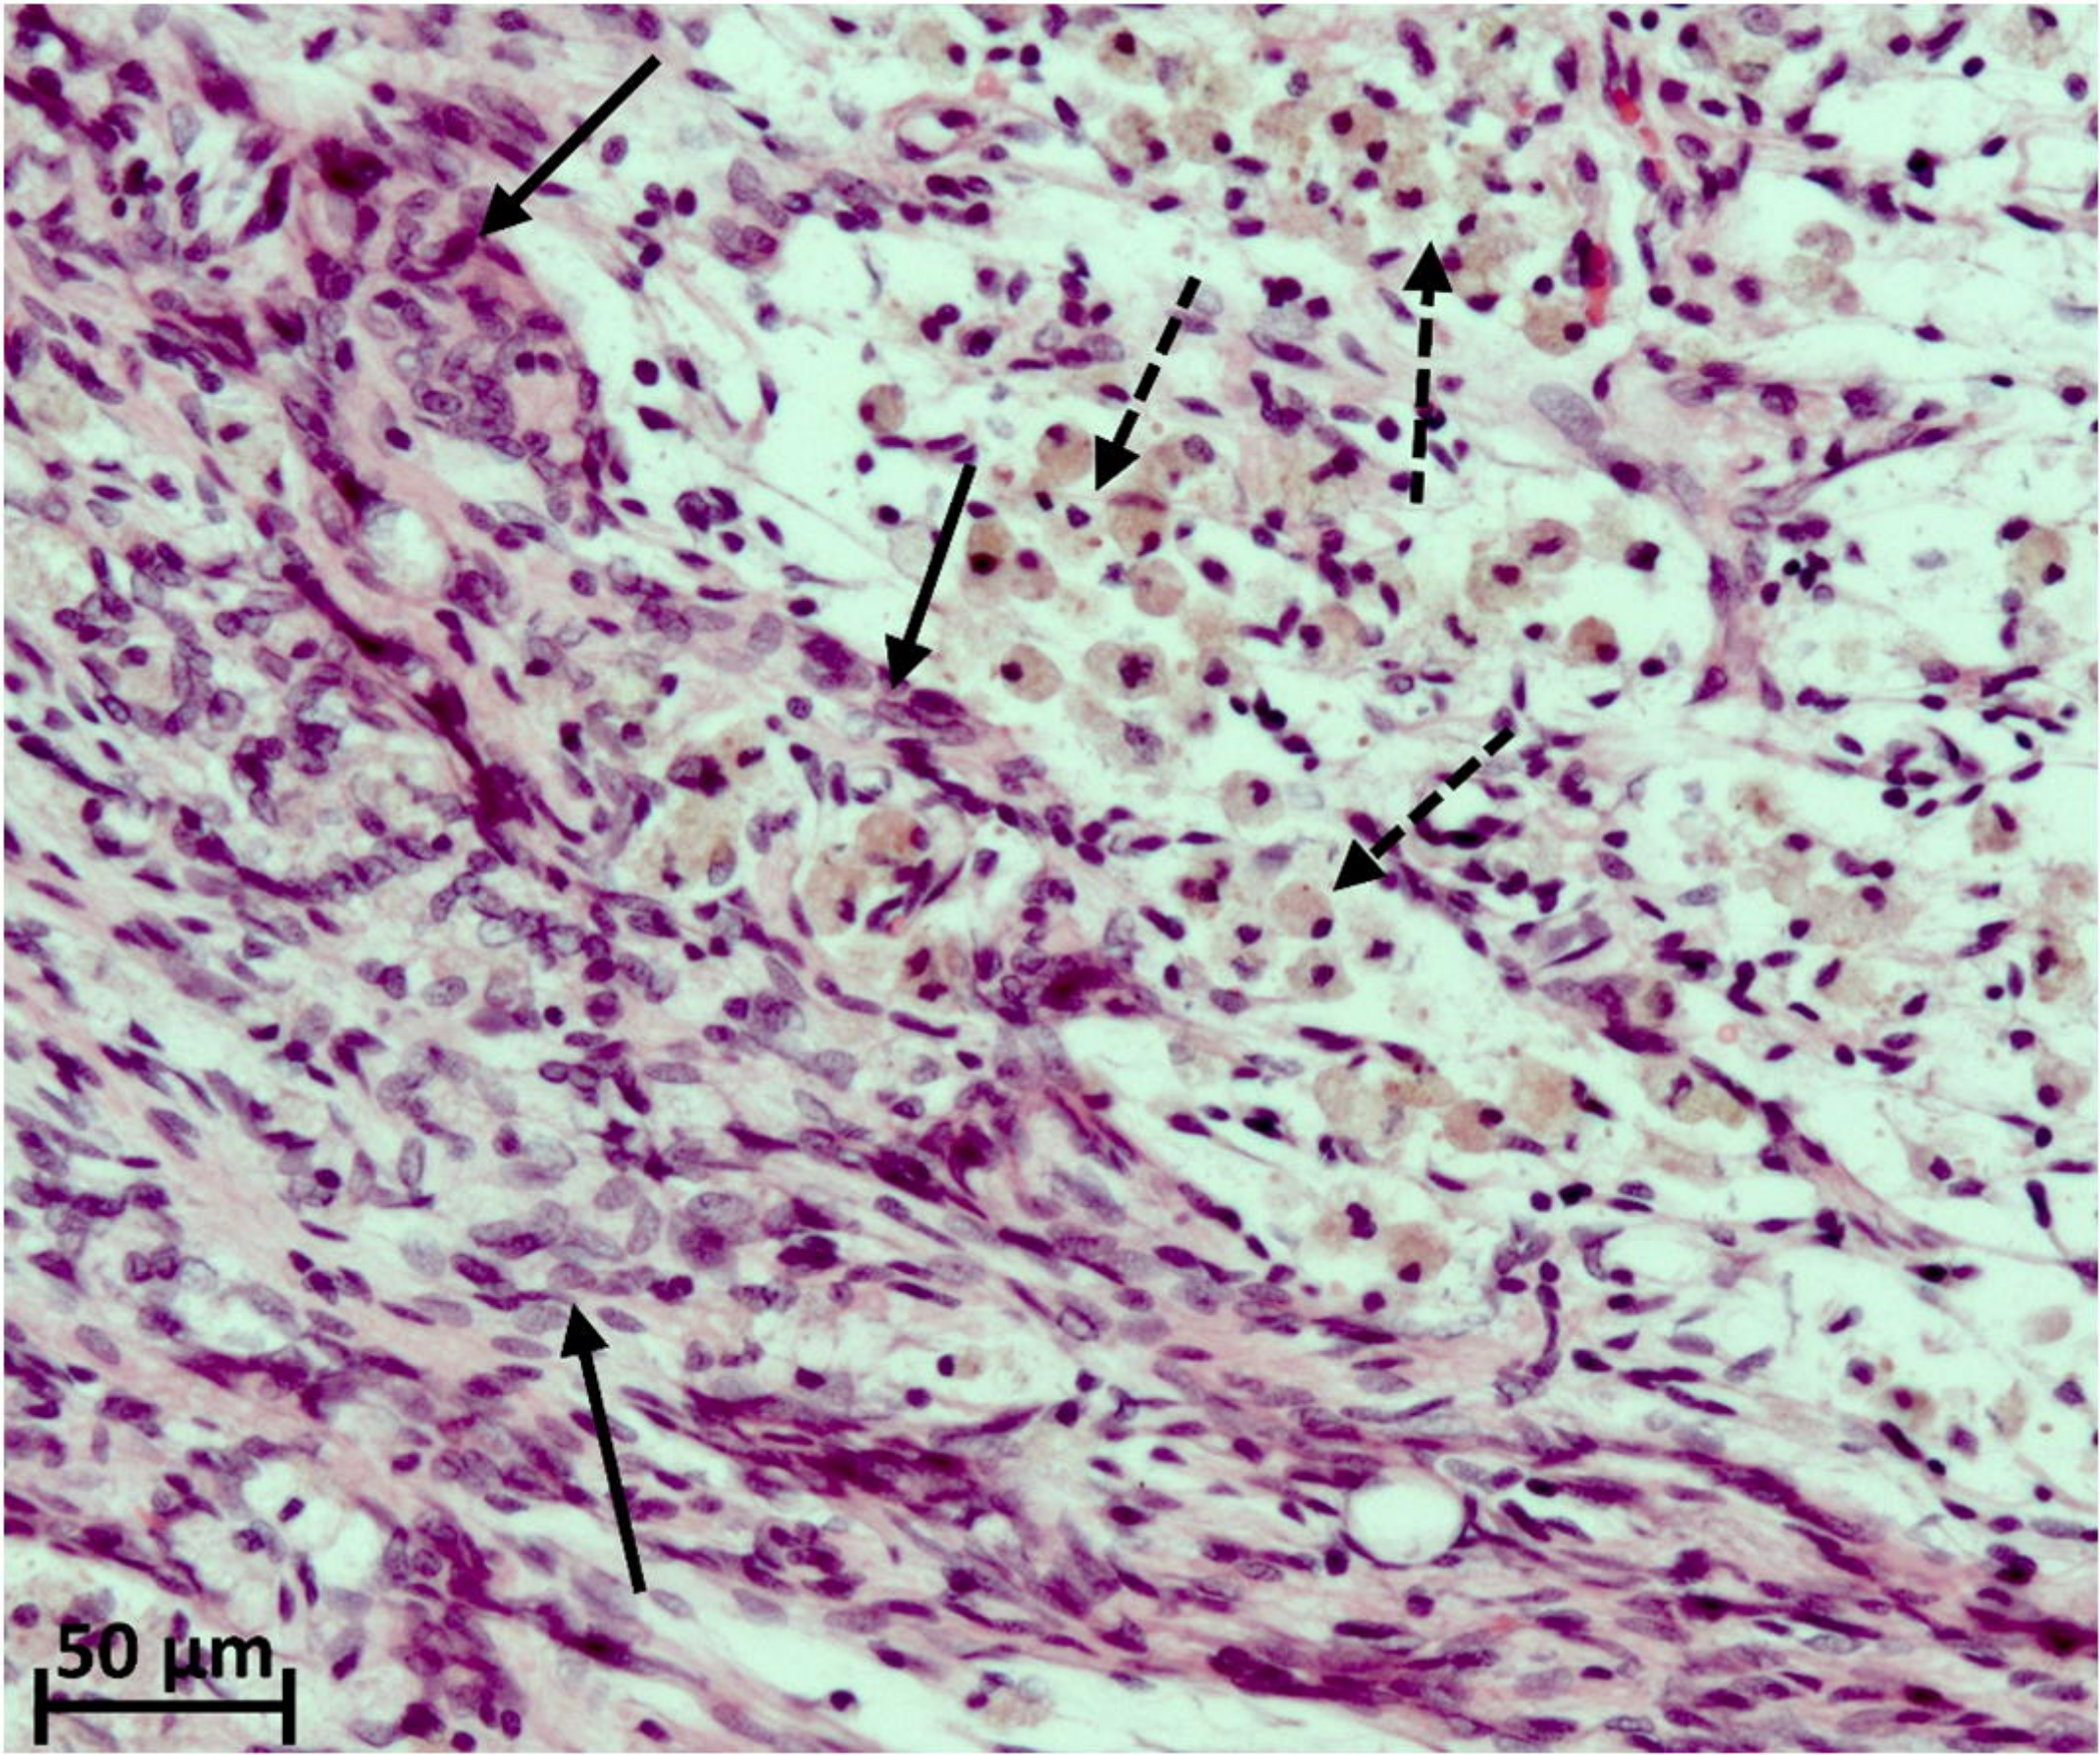



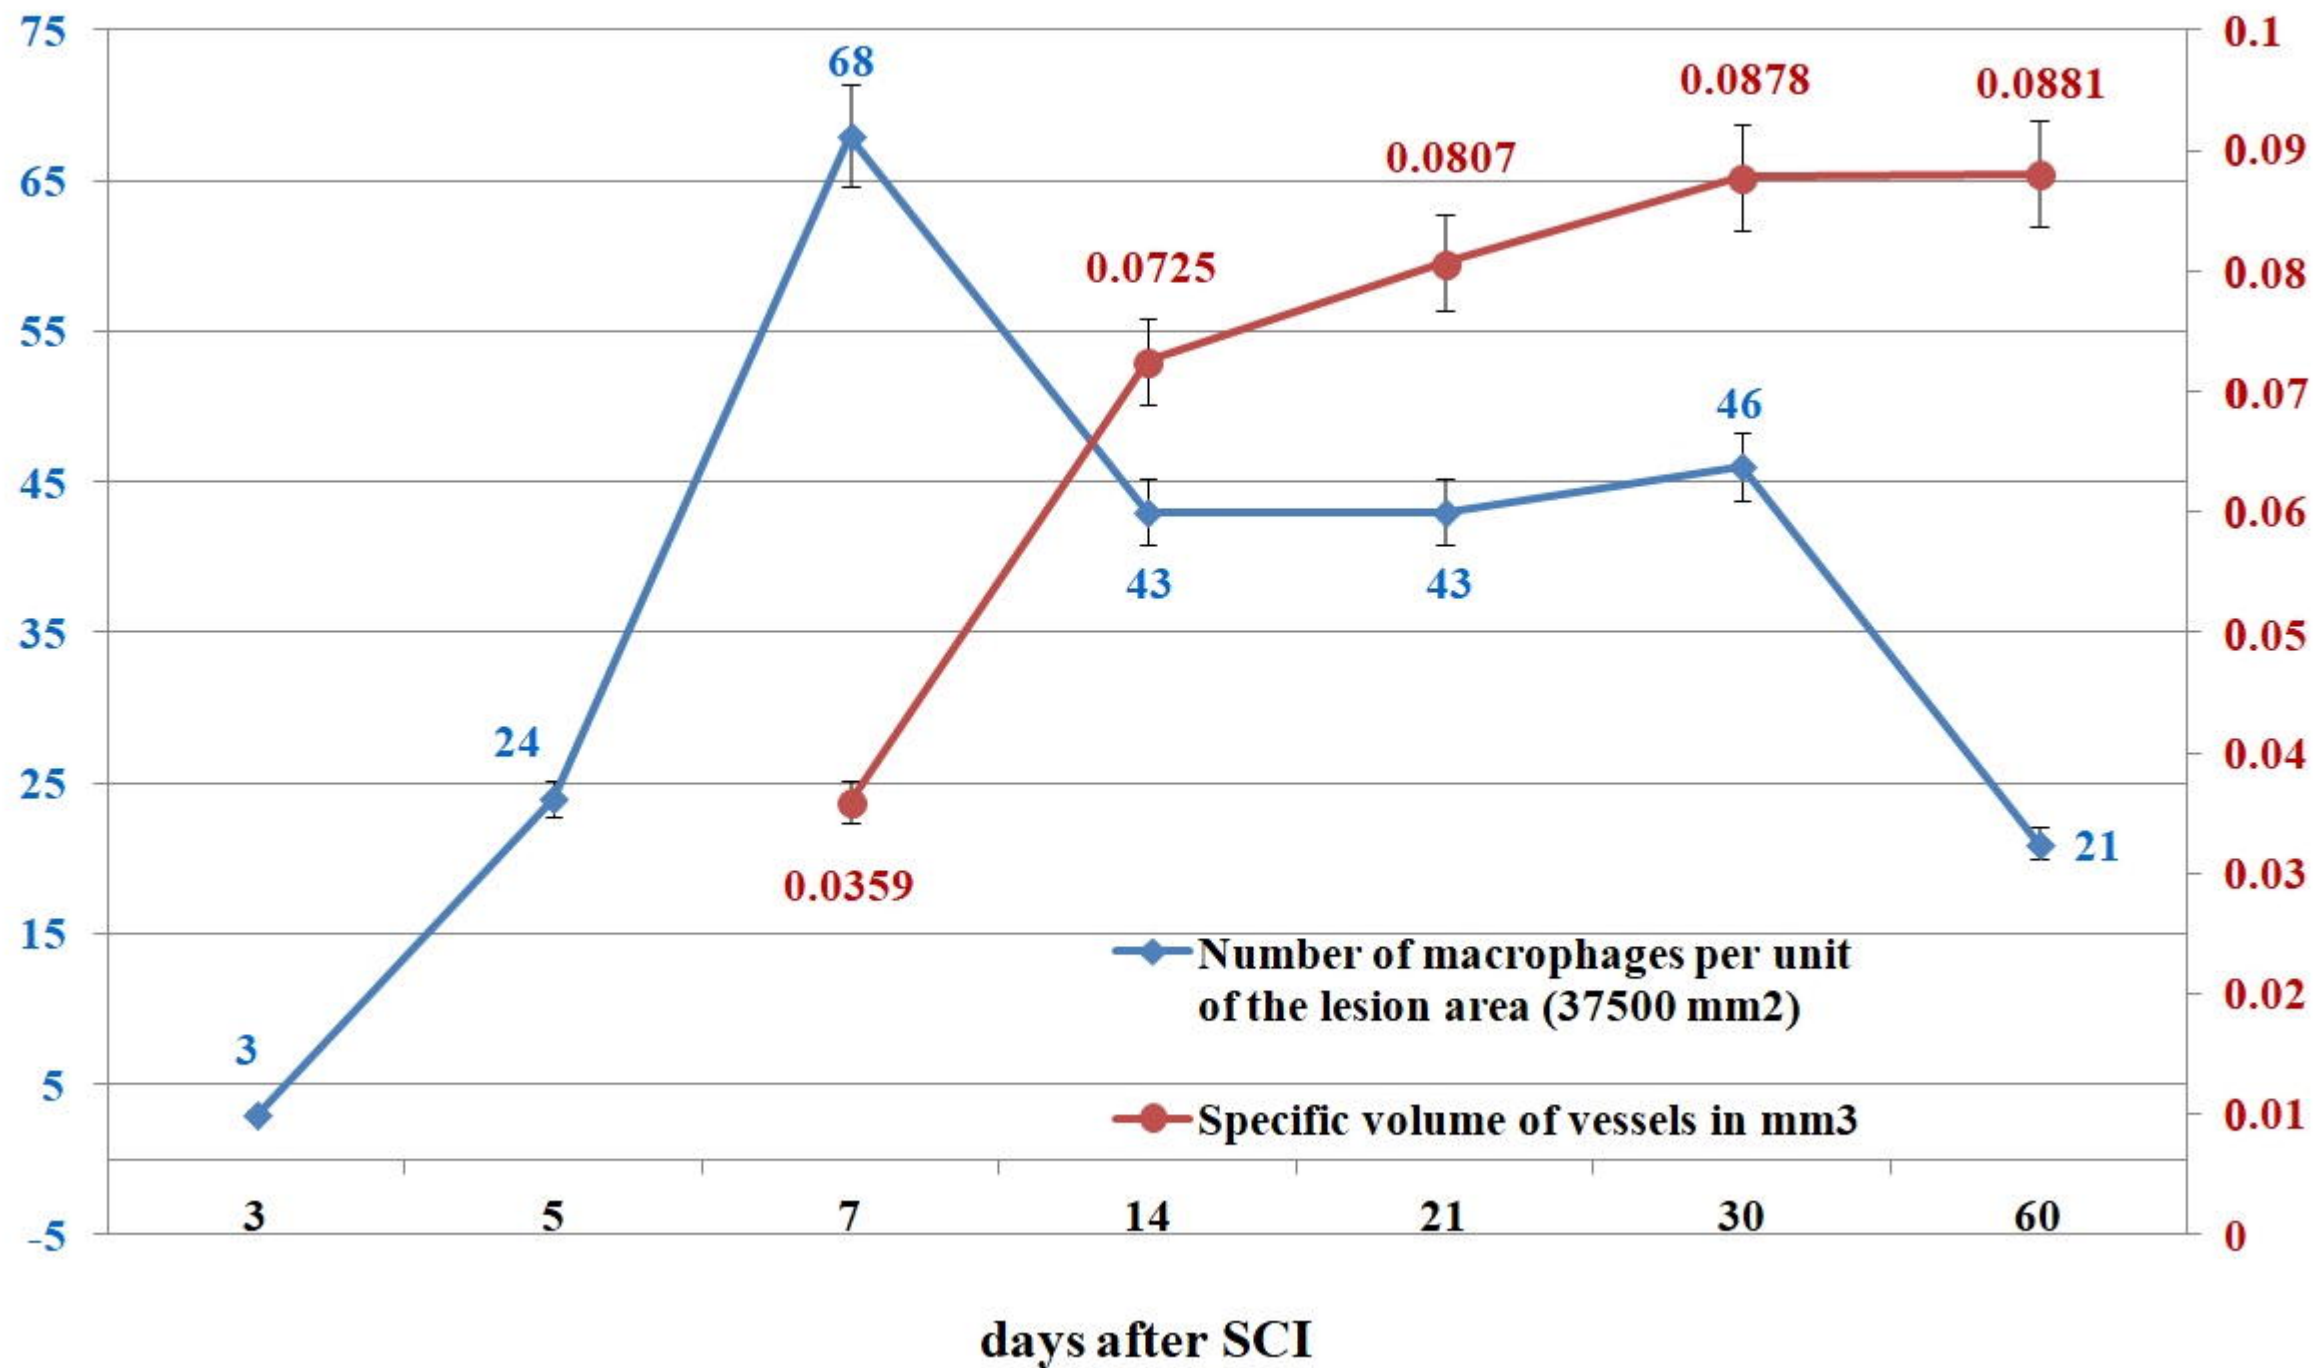

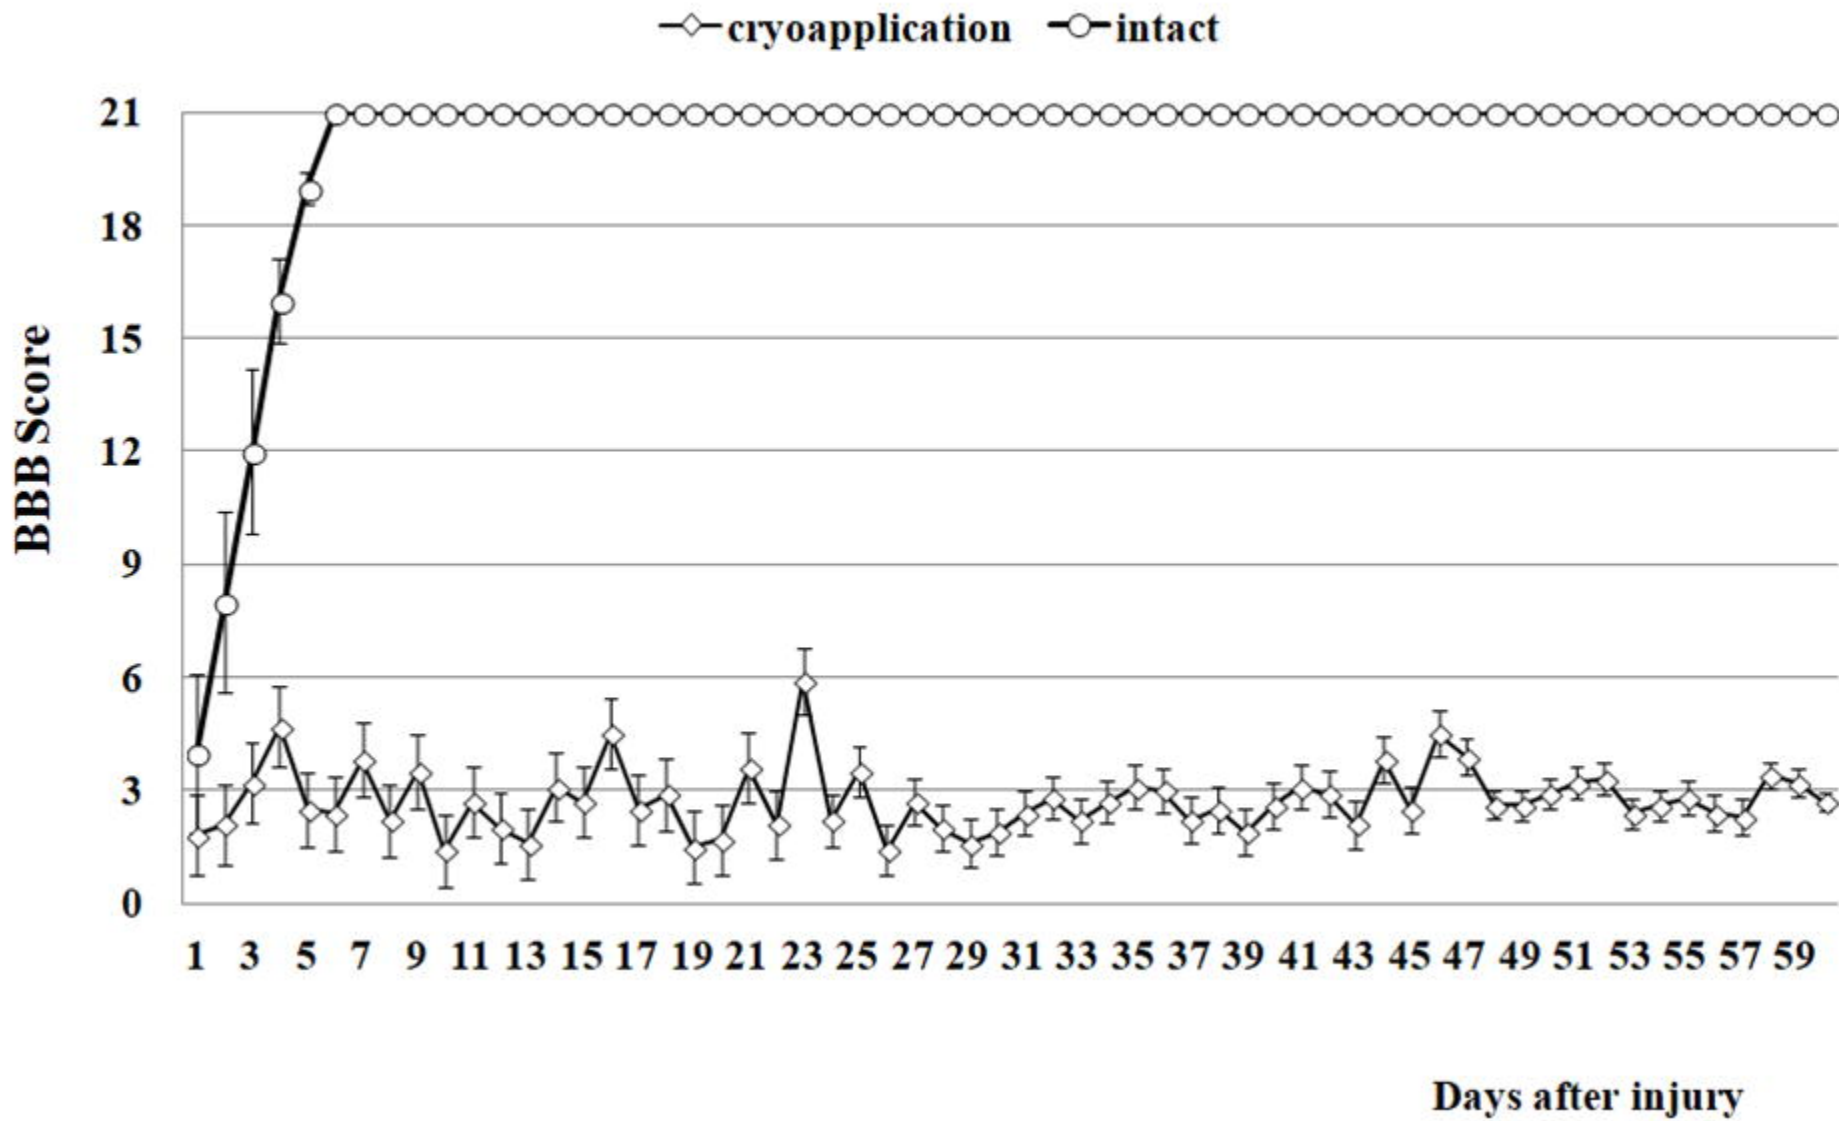

**A**

bioRxiv preprint doi: <https://doi.org/10.1101/2020.09.09.289025>; this version posted September 9, 2020. The copyright holder for this preprint (which was not certified by peer review) is the author/funder. All rights reserved. No reuse allowed without permission.

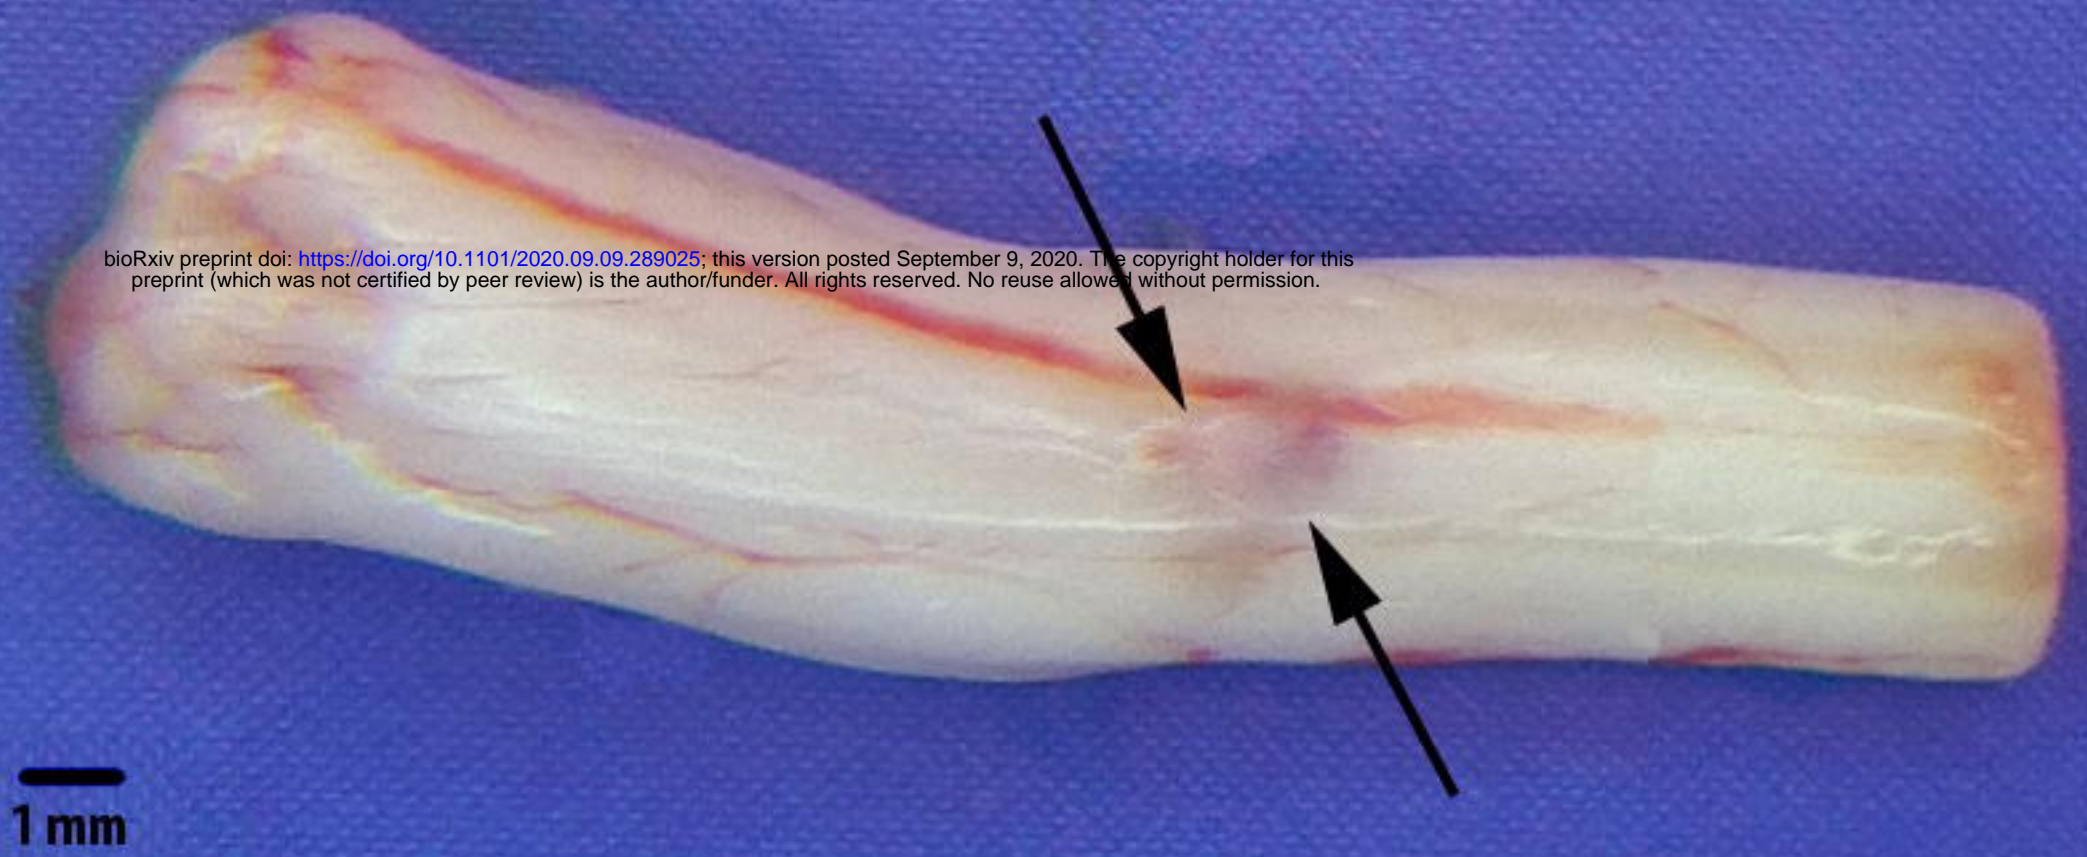**B**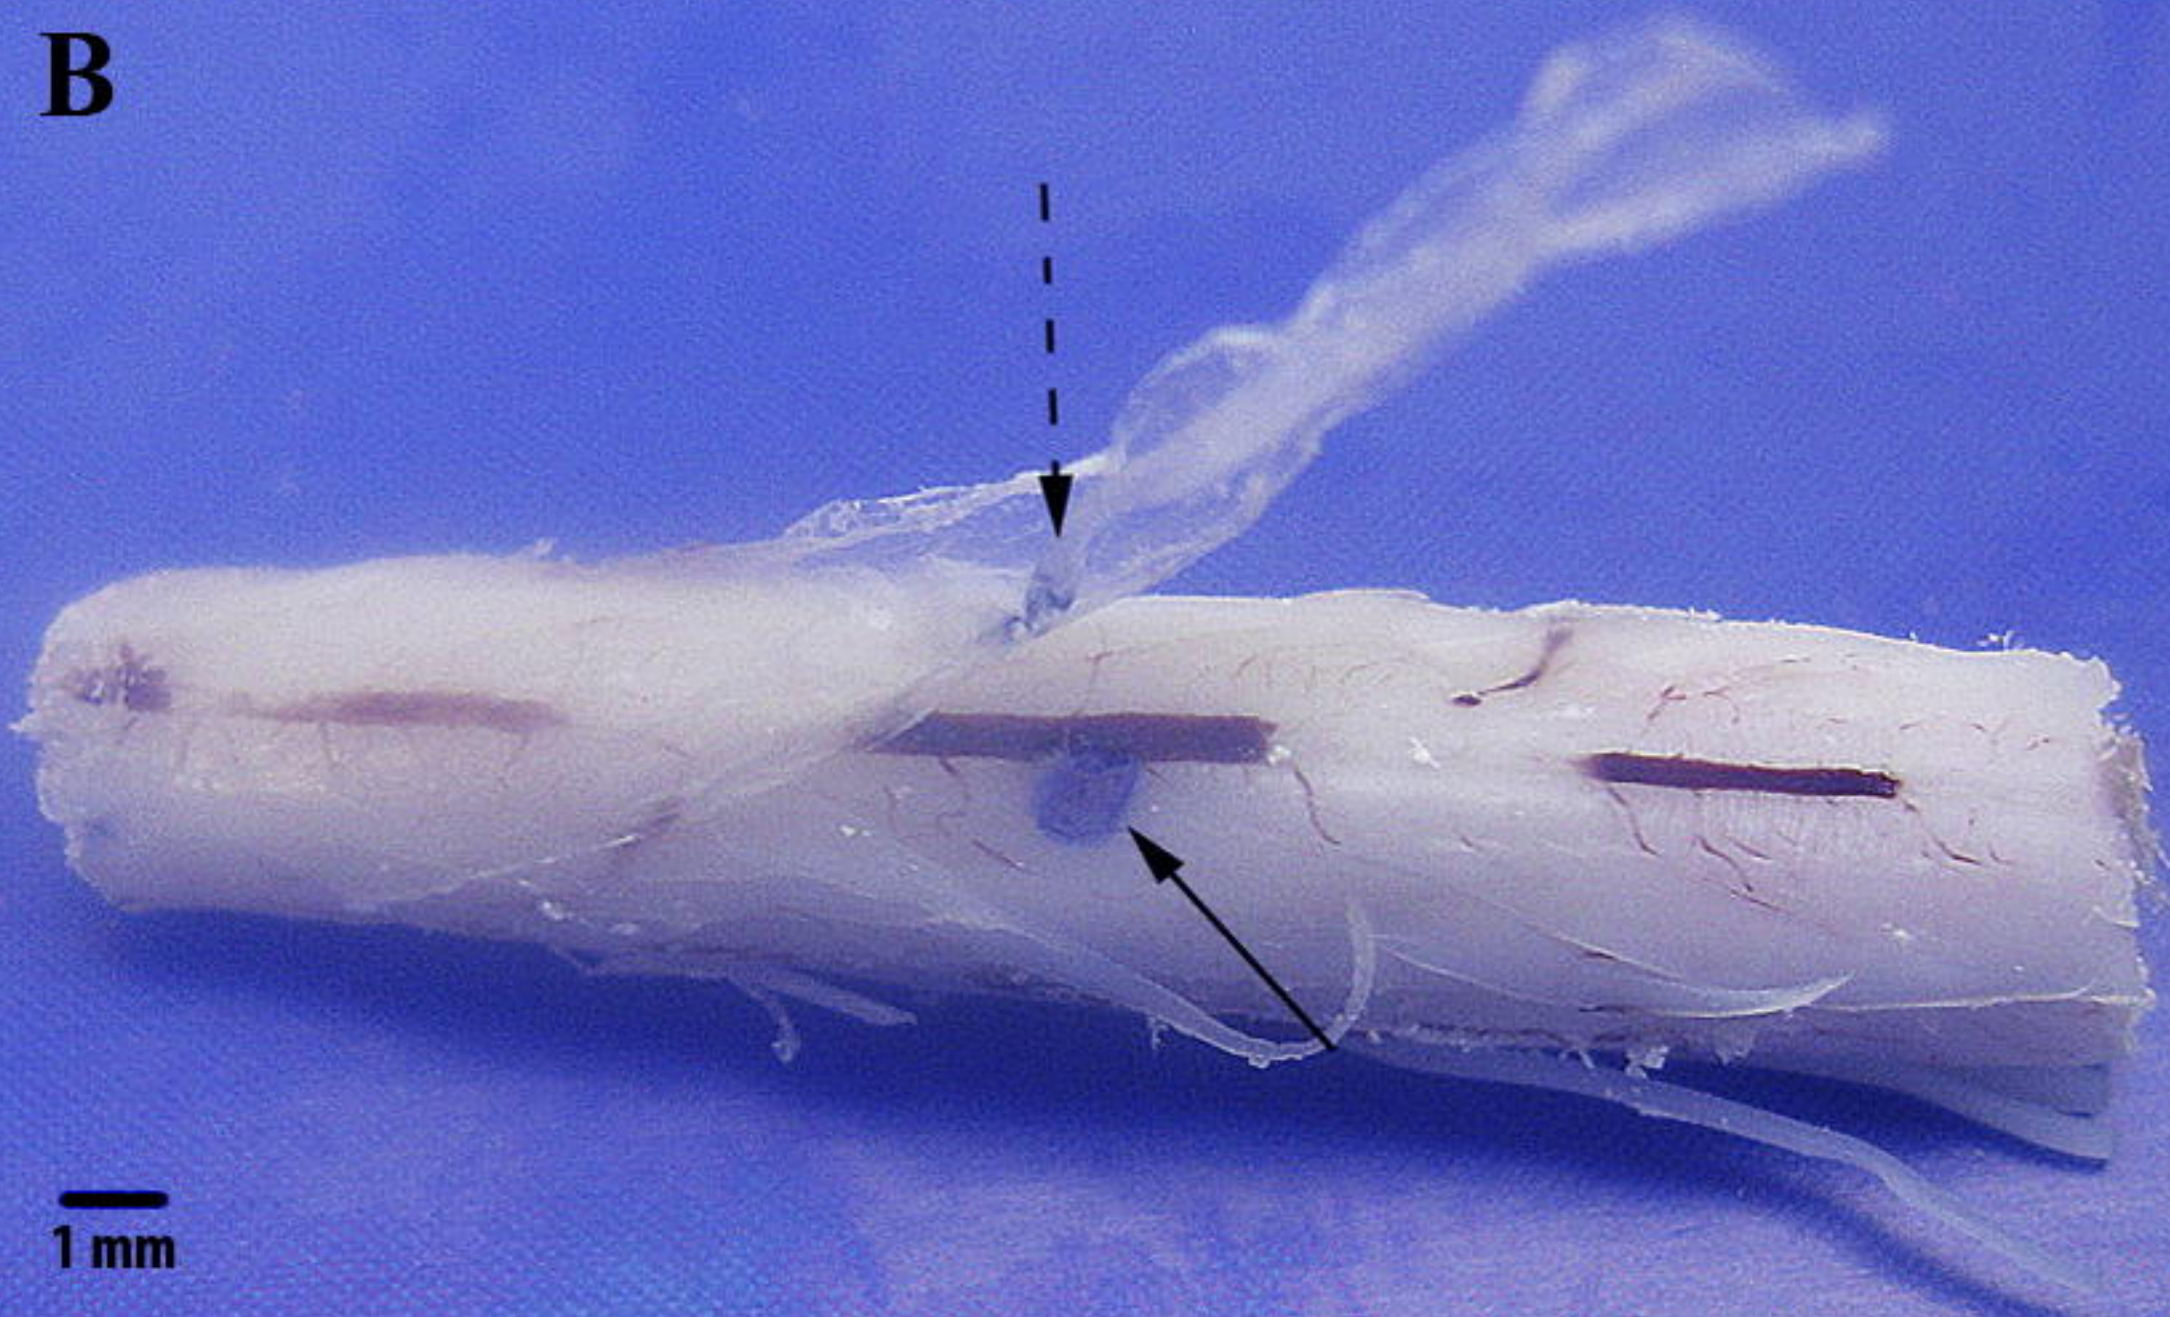

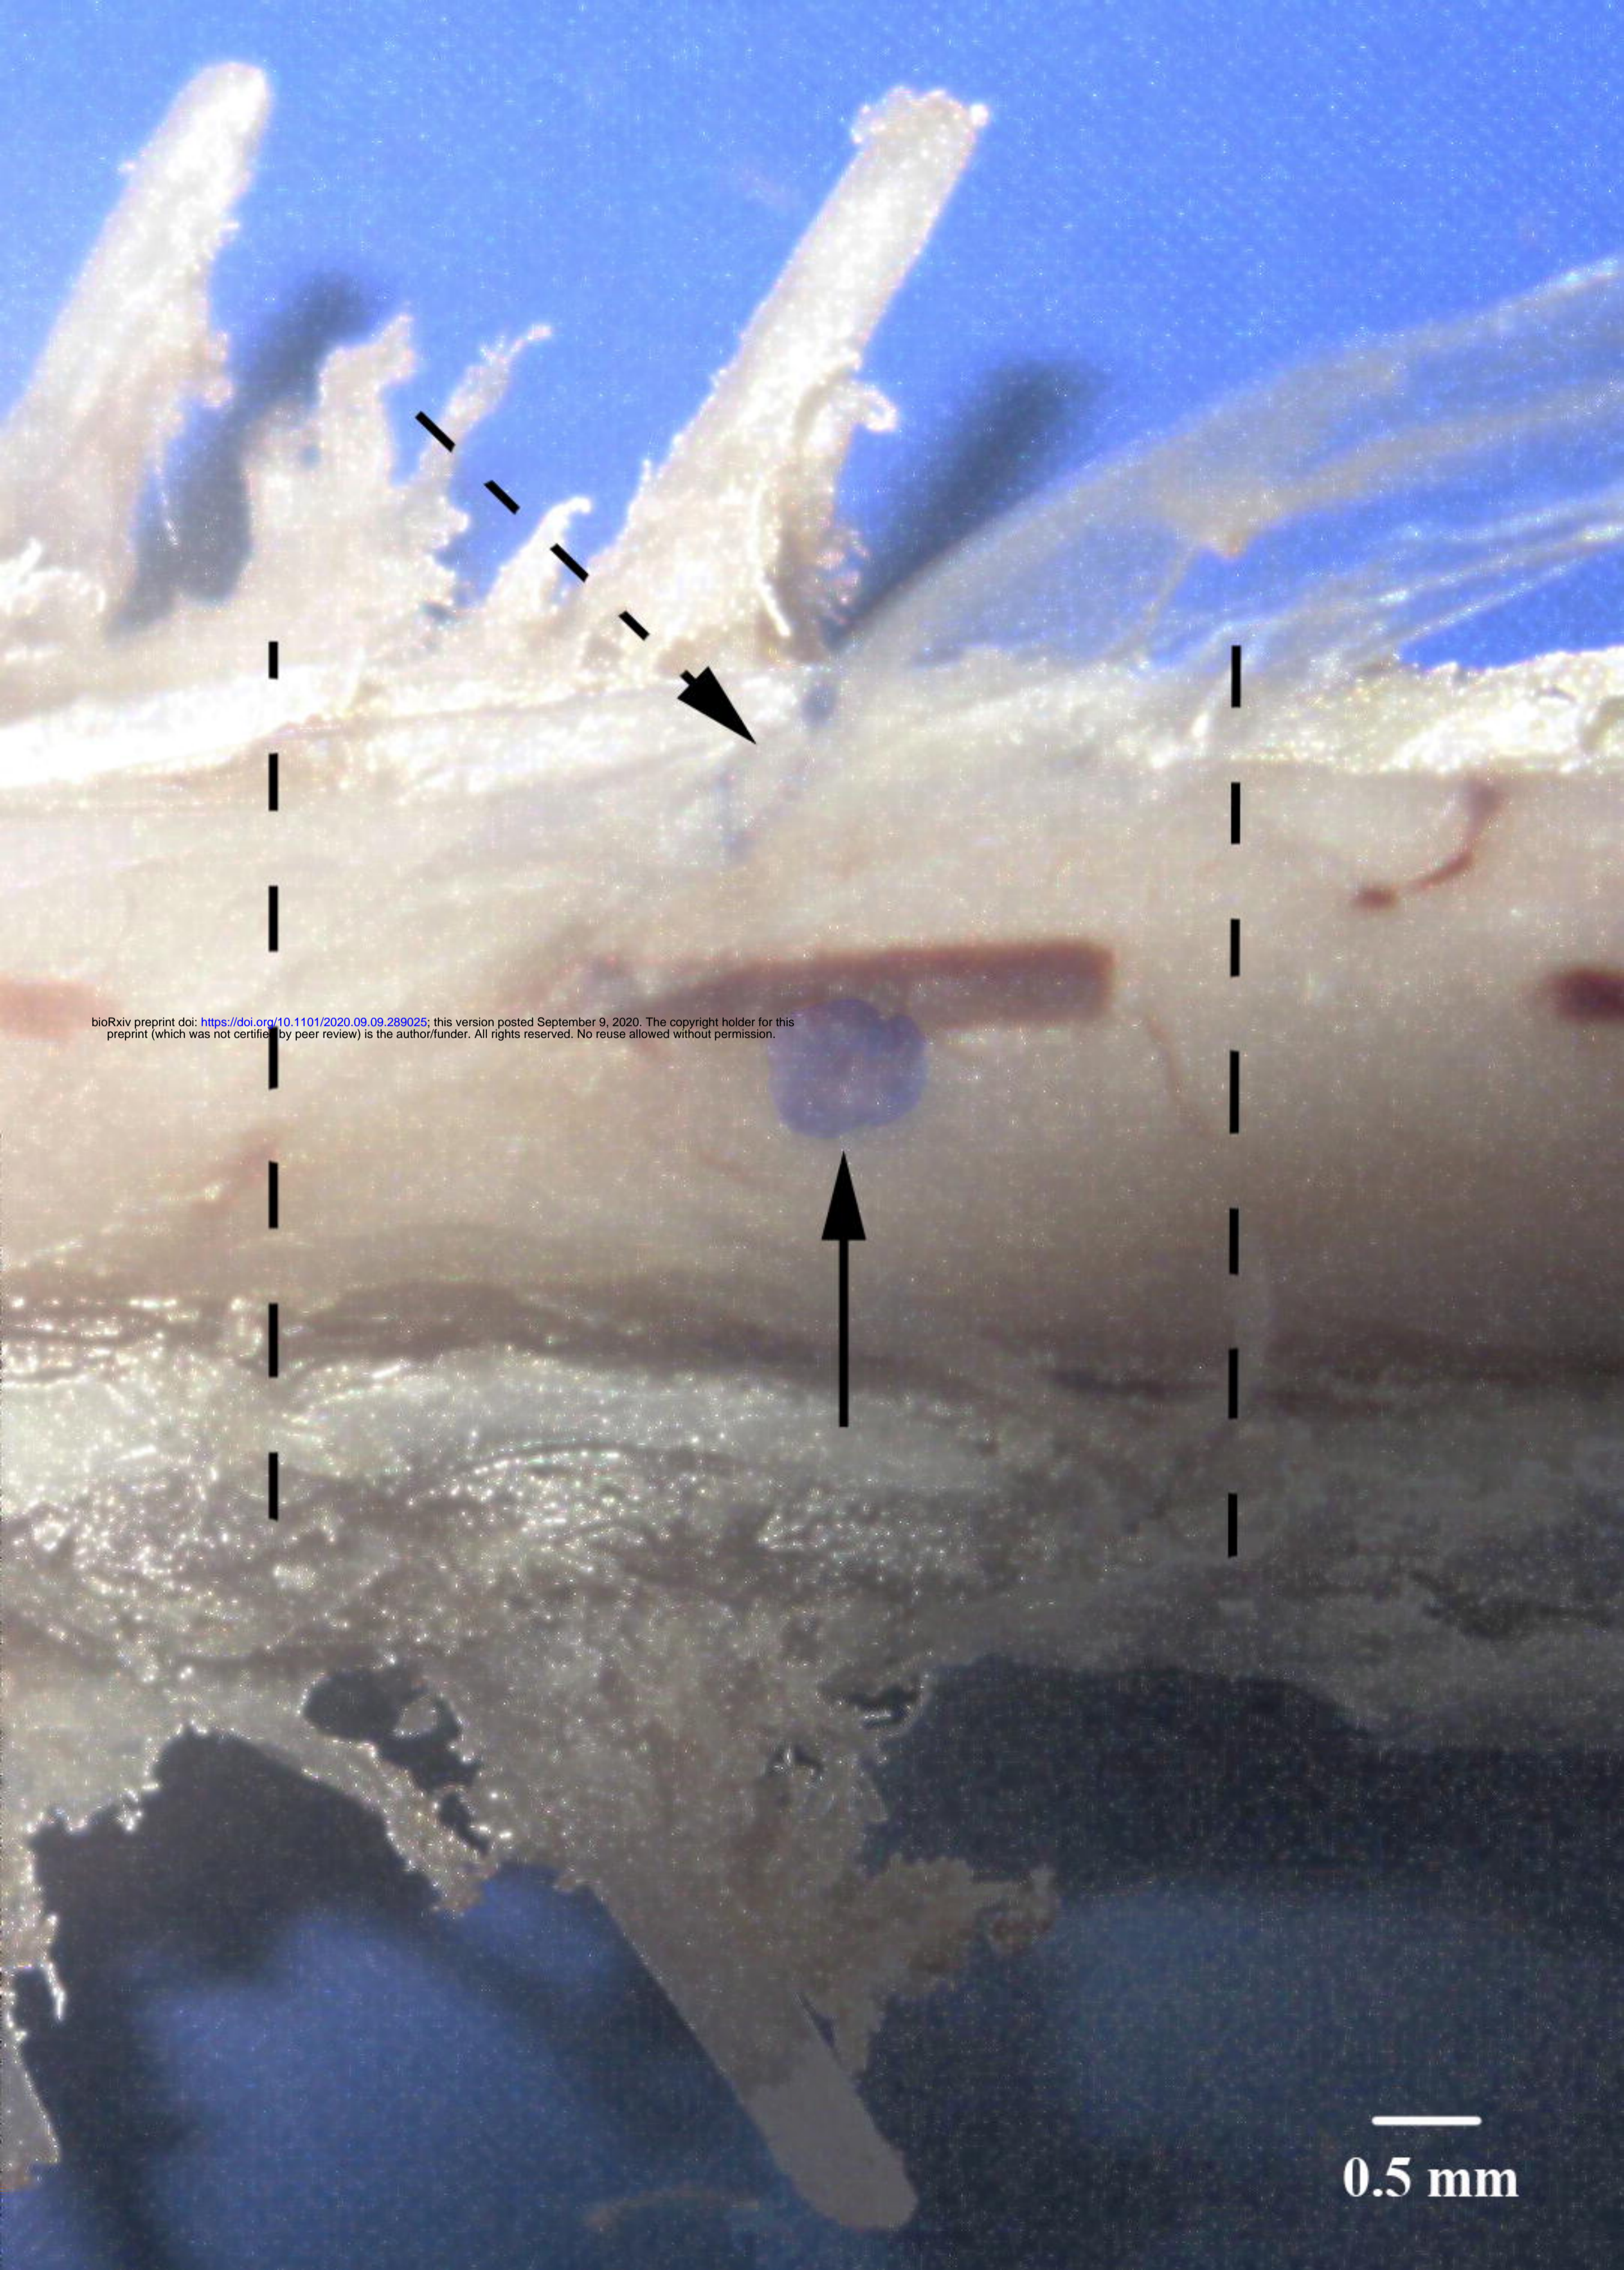

bioRxiv preprint doi: <https://doi.org/10.1101/2020.09.09.289025>; this version posted September 9, 2020. The copyright holder for this preprint (which was not certified by peer review) is the author/funder. All rights reserved. No reuse allowed without permission.

—  
0.5 mm

50  $\mu\text{m}$

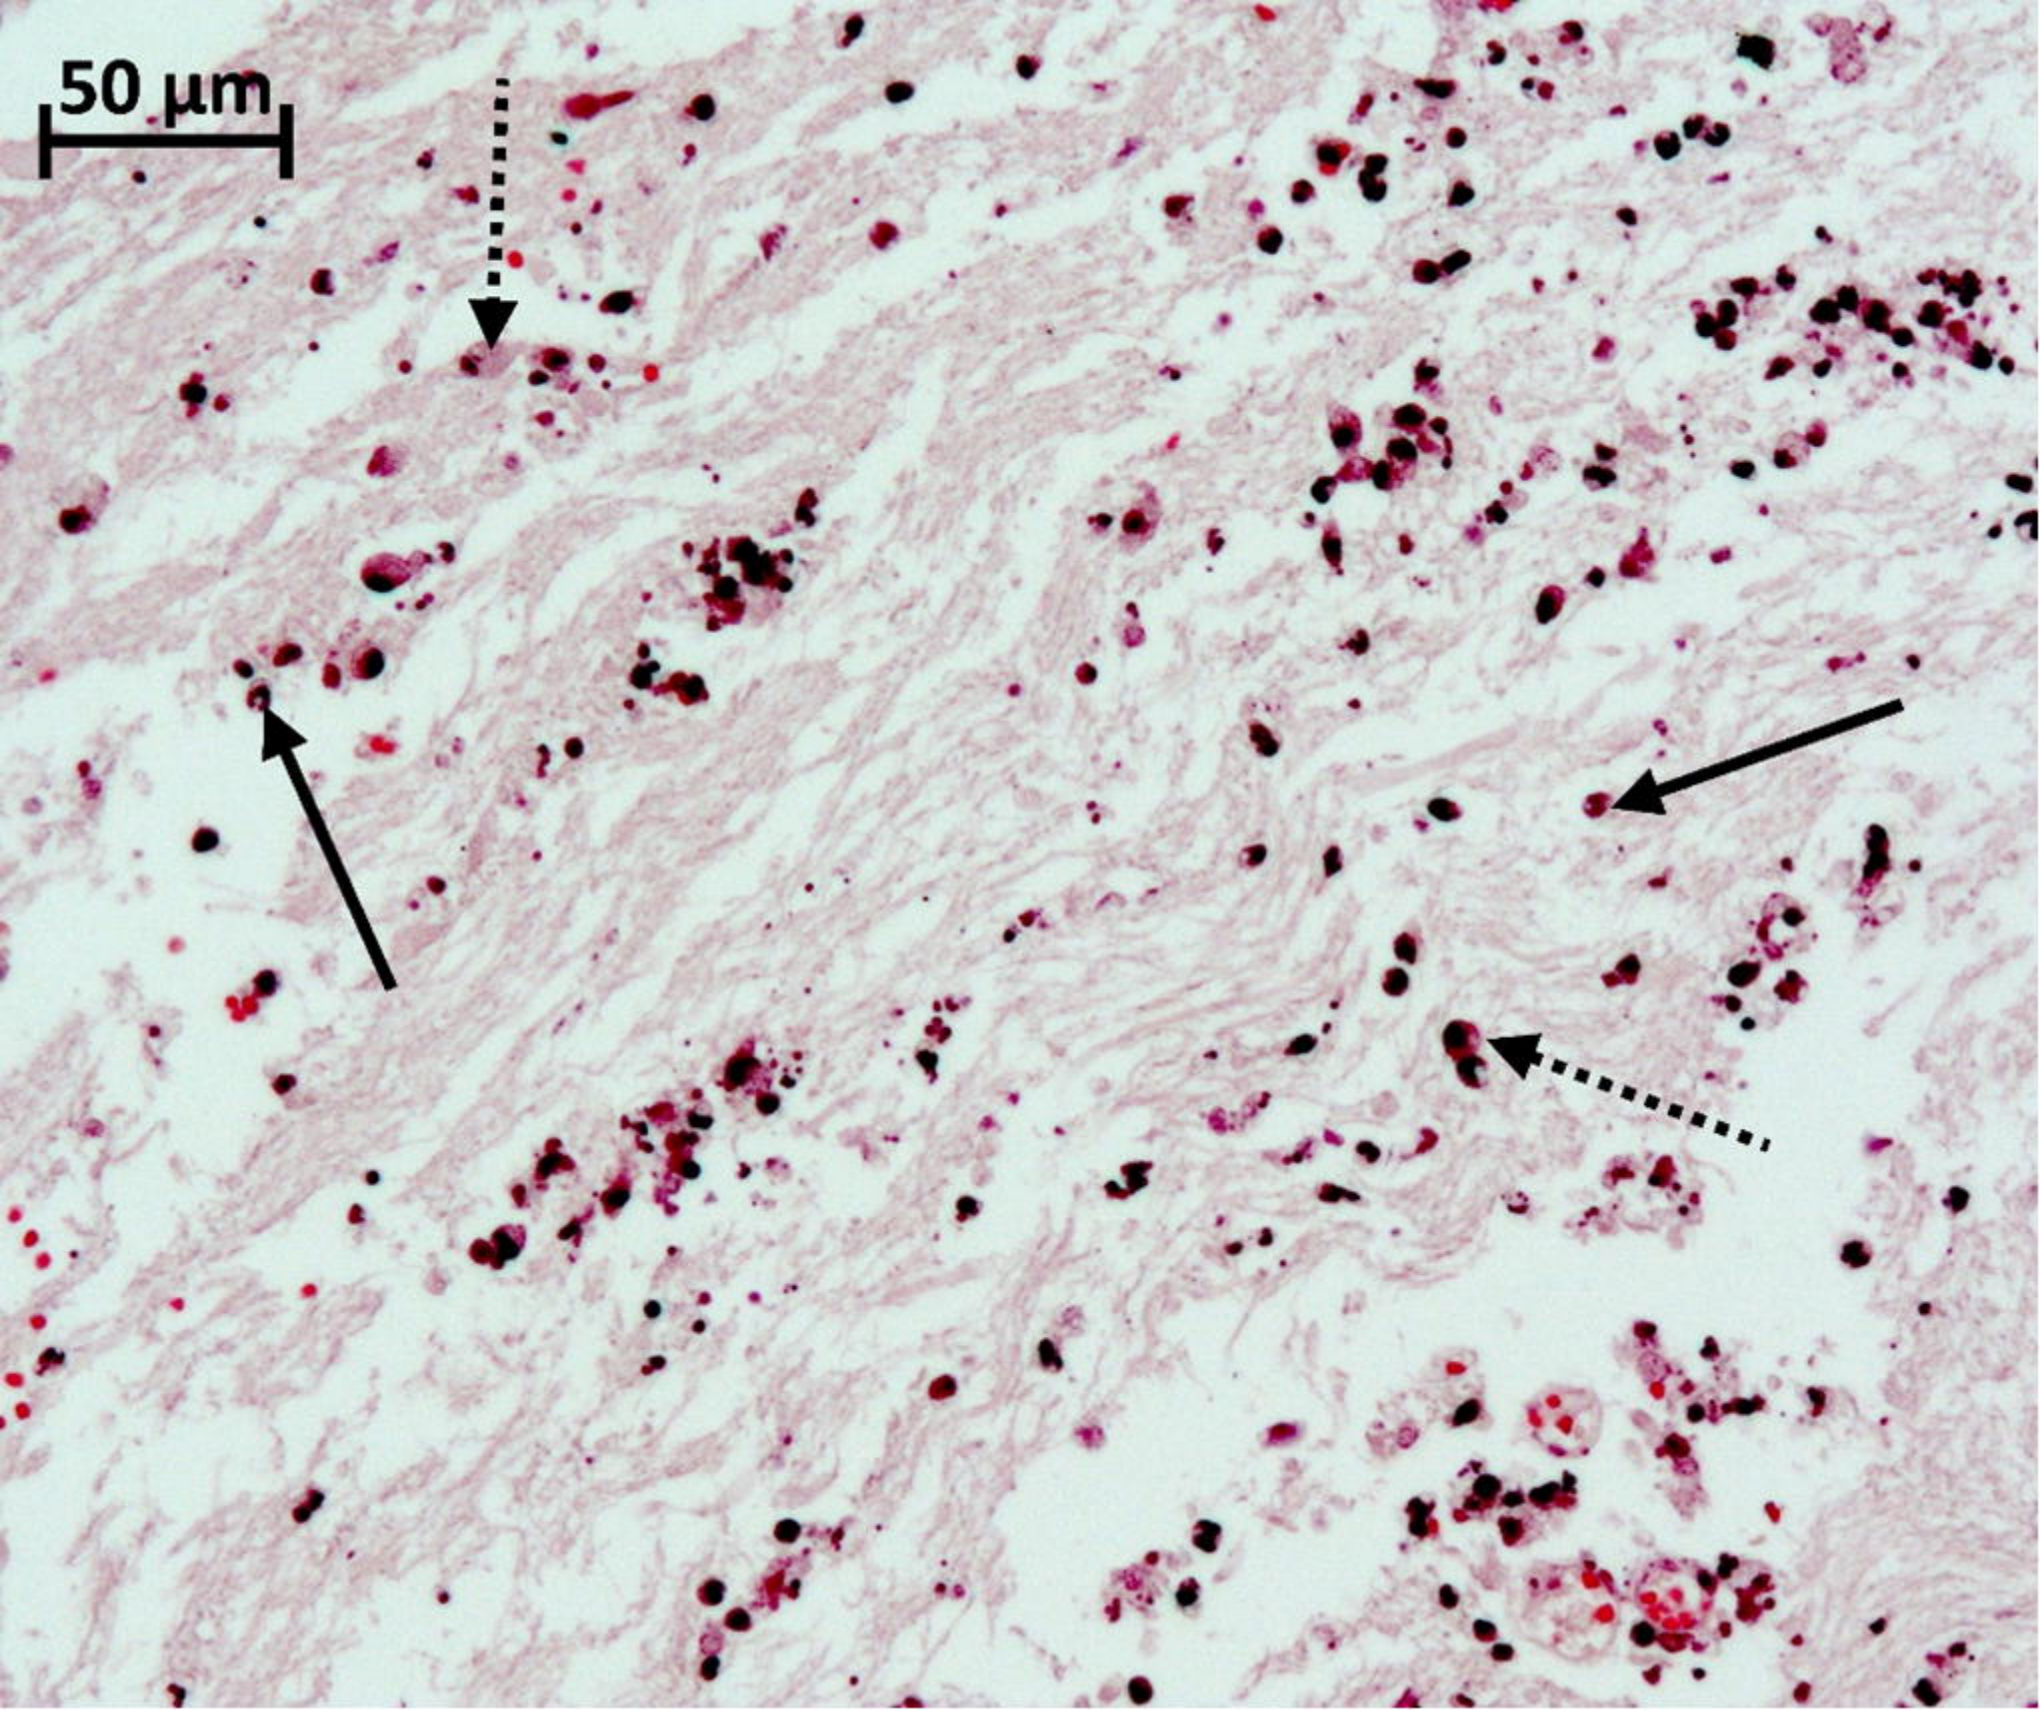

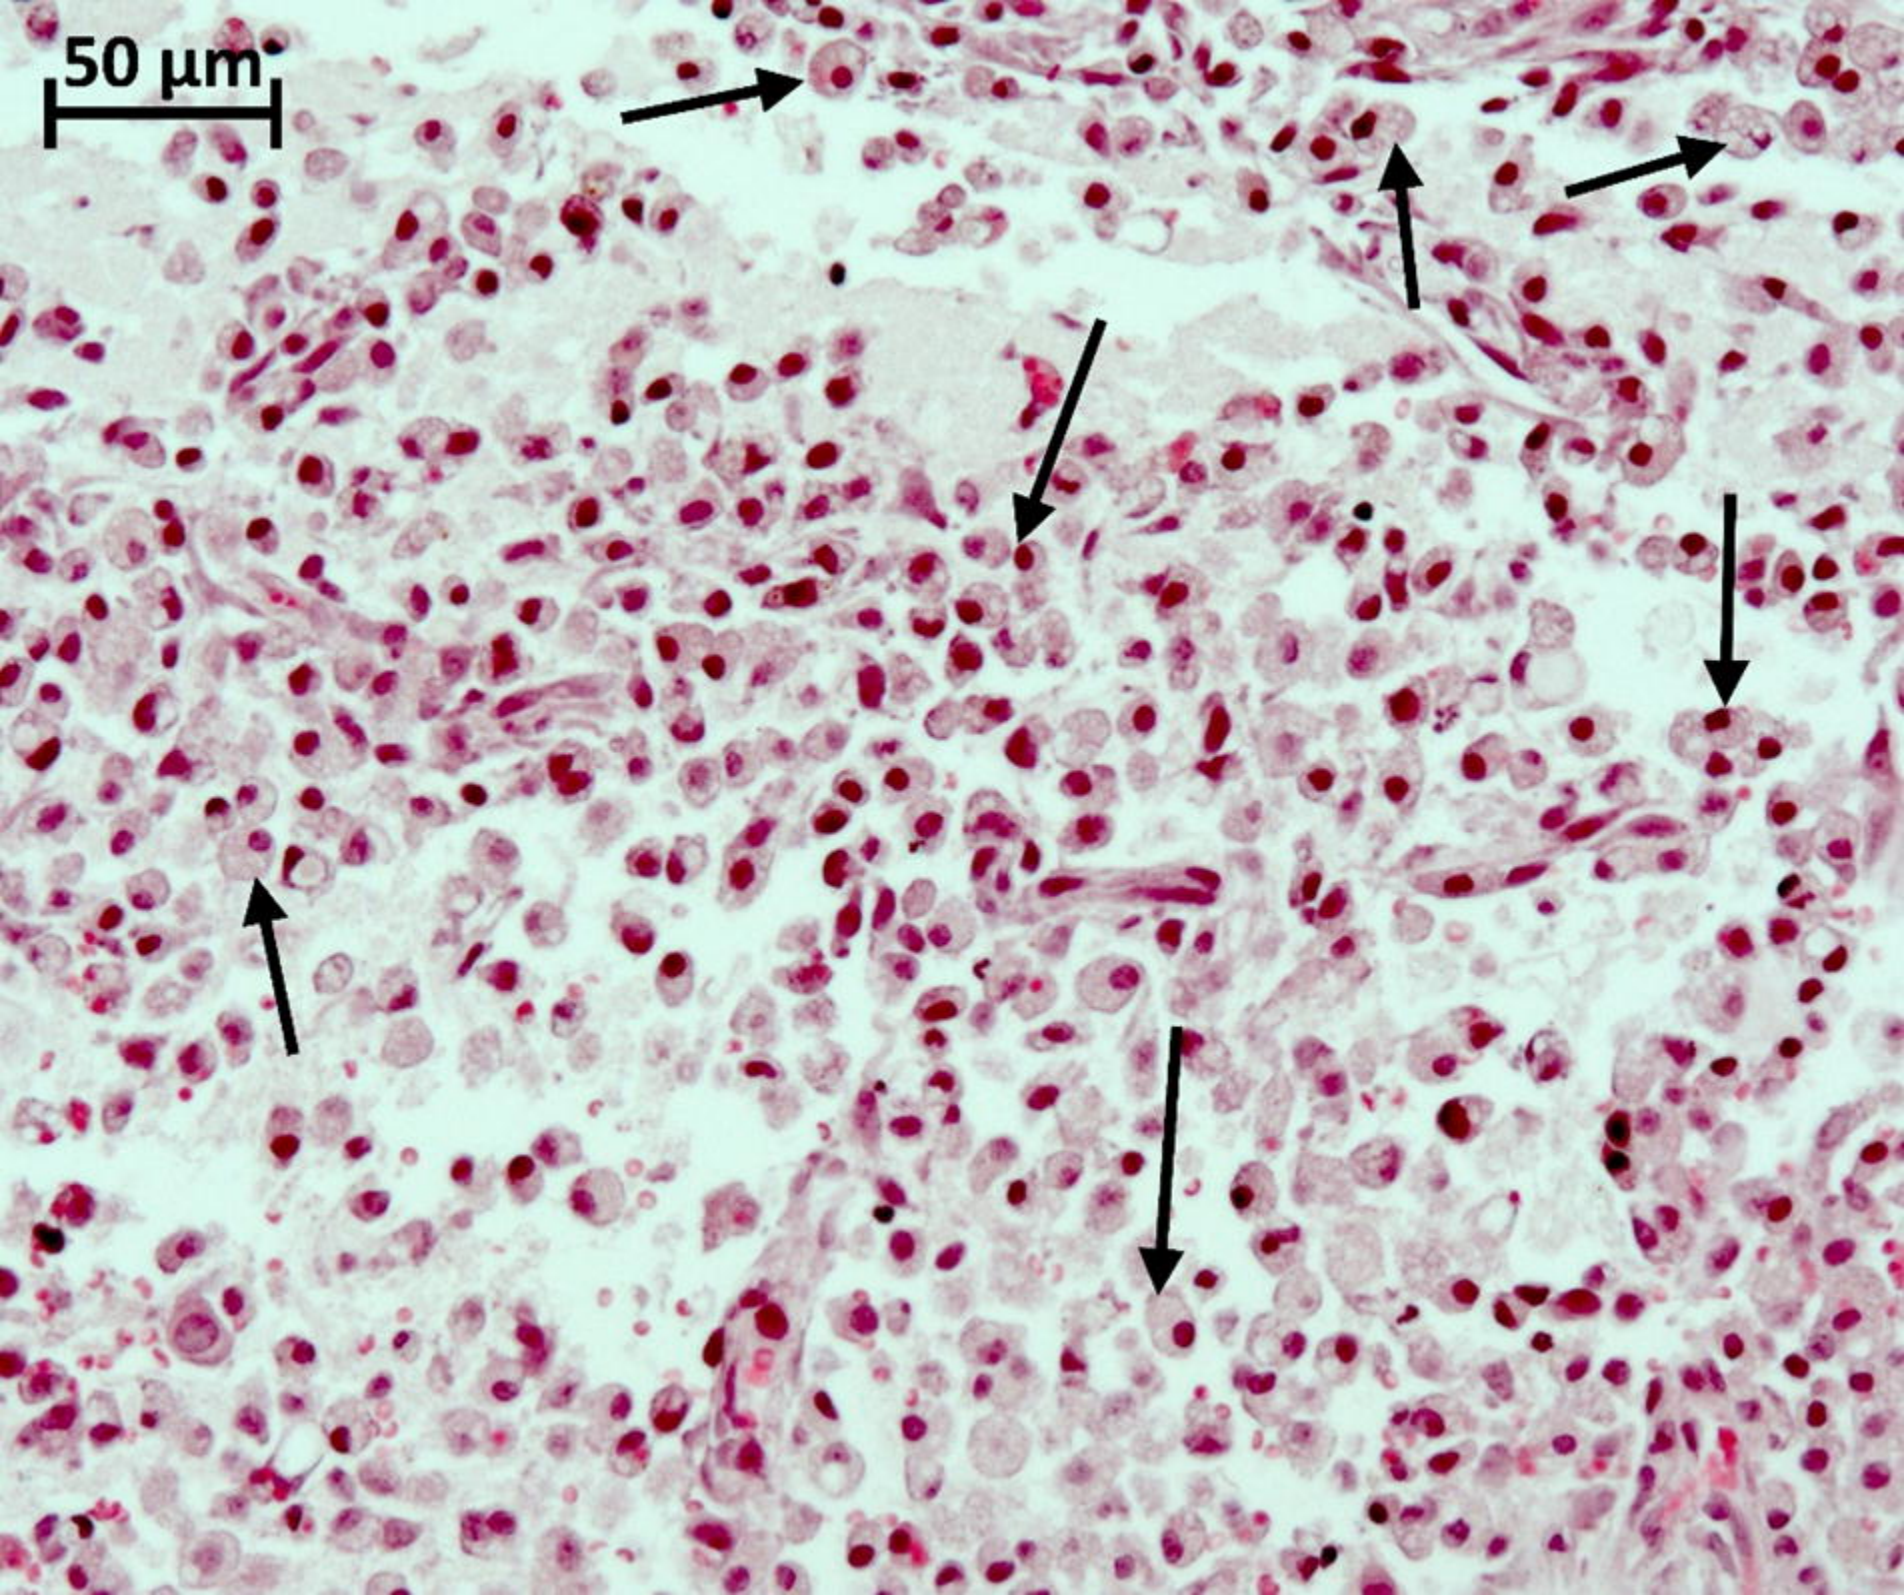

50  $\mu\text{m}$

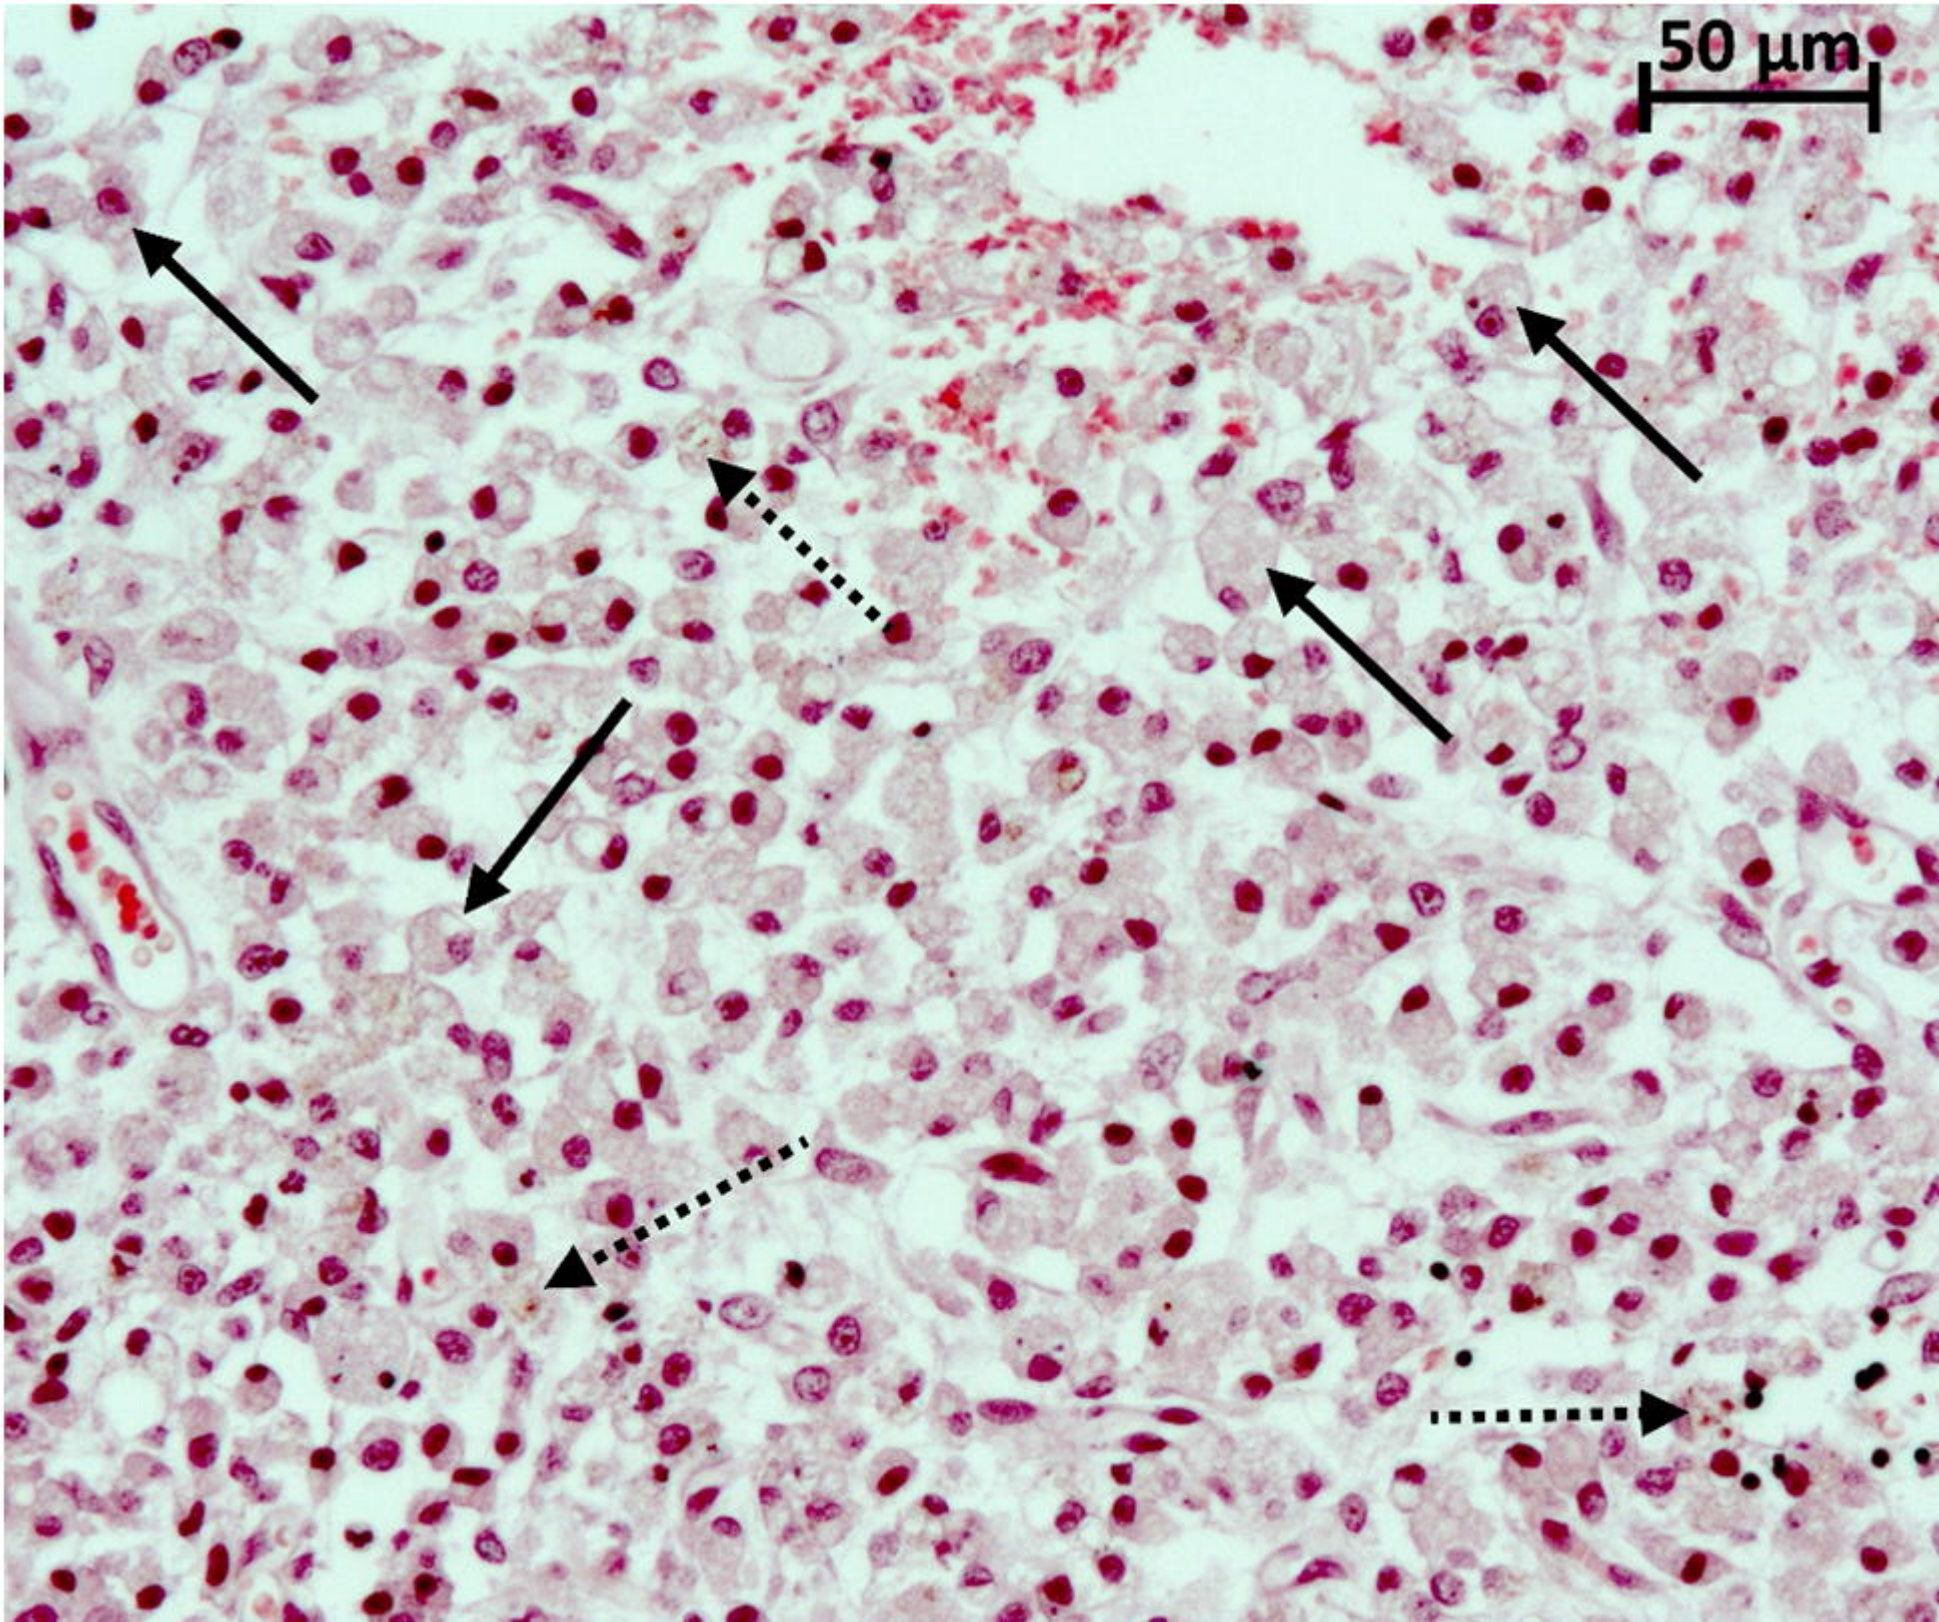

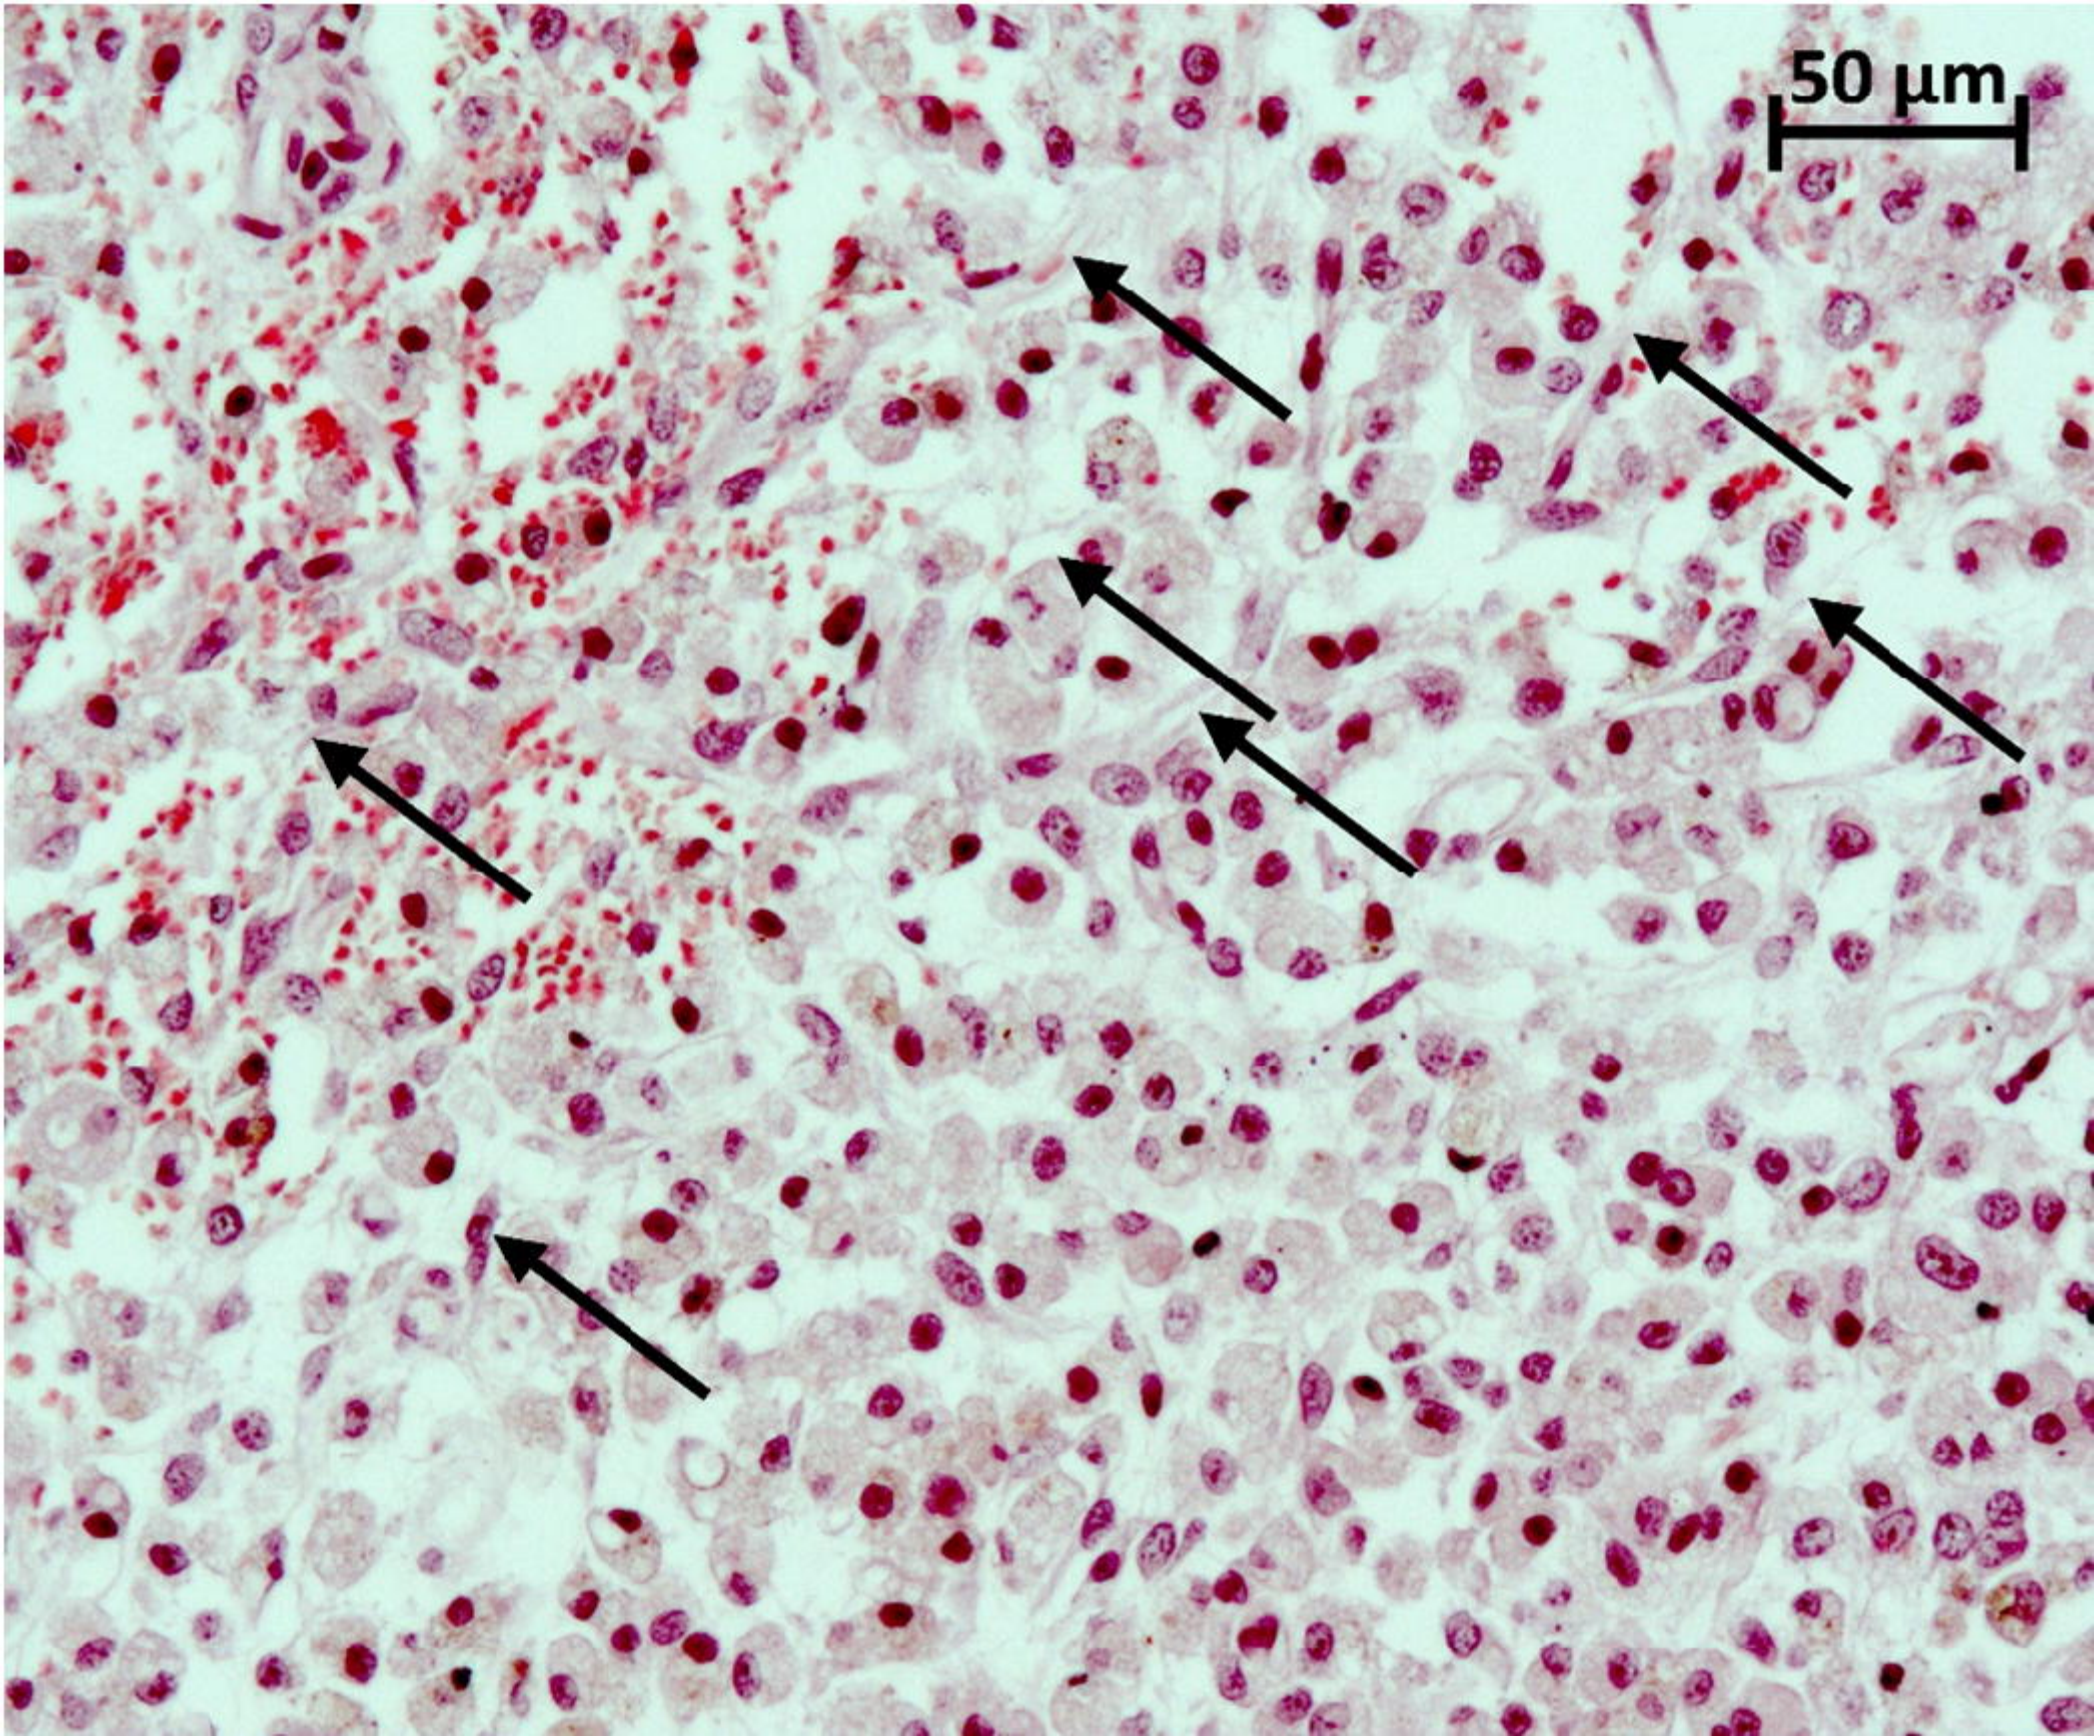

50  $\mu\text{m}$



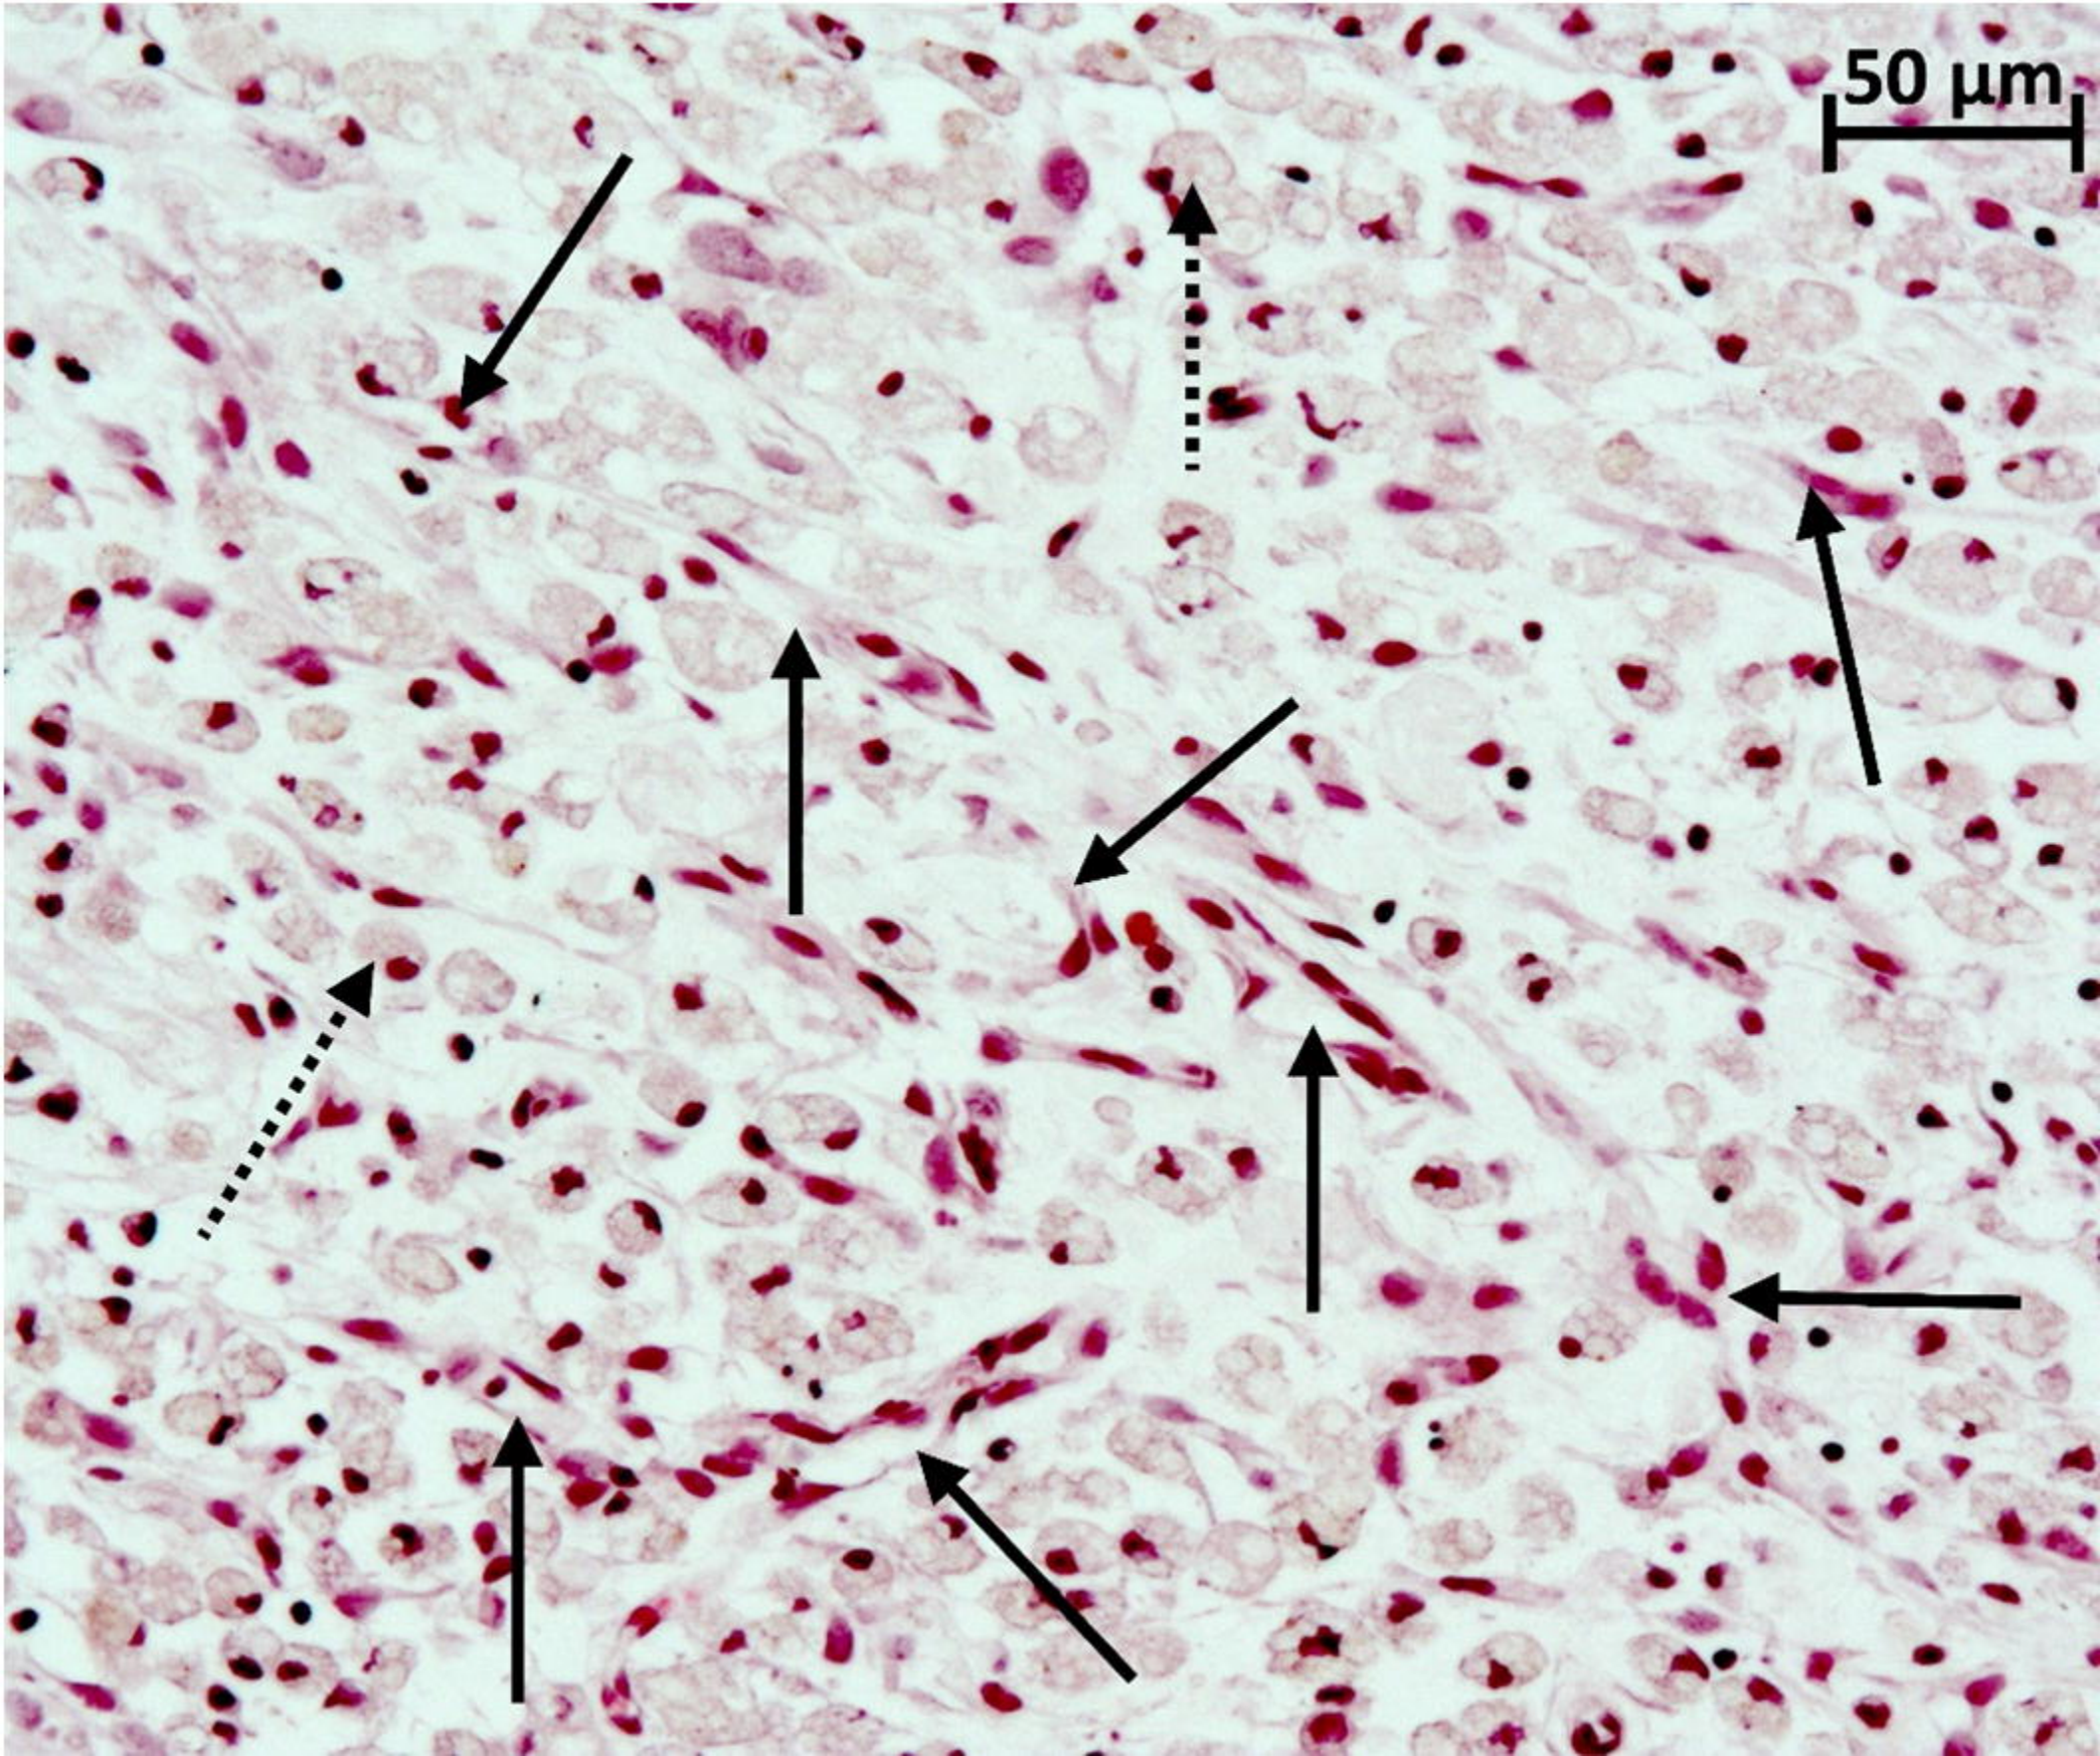

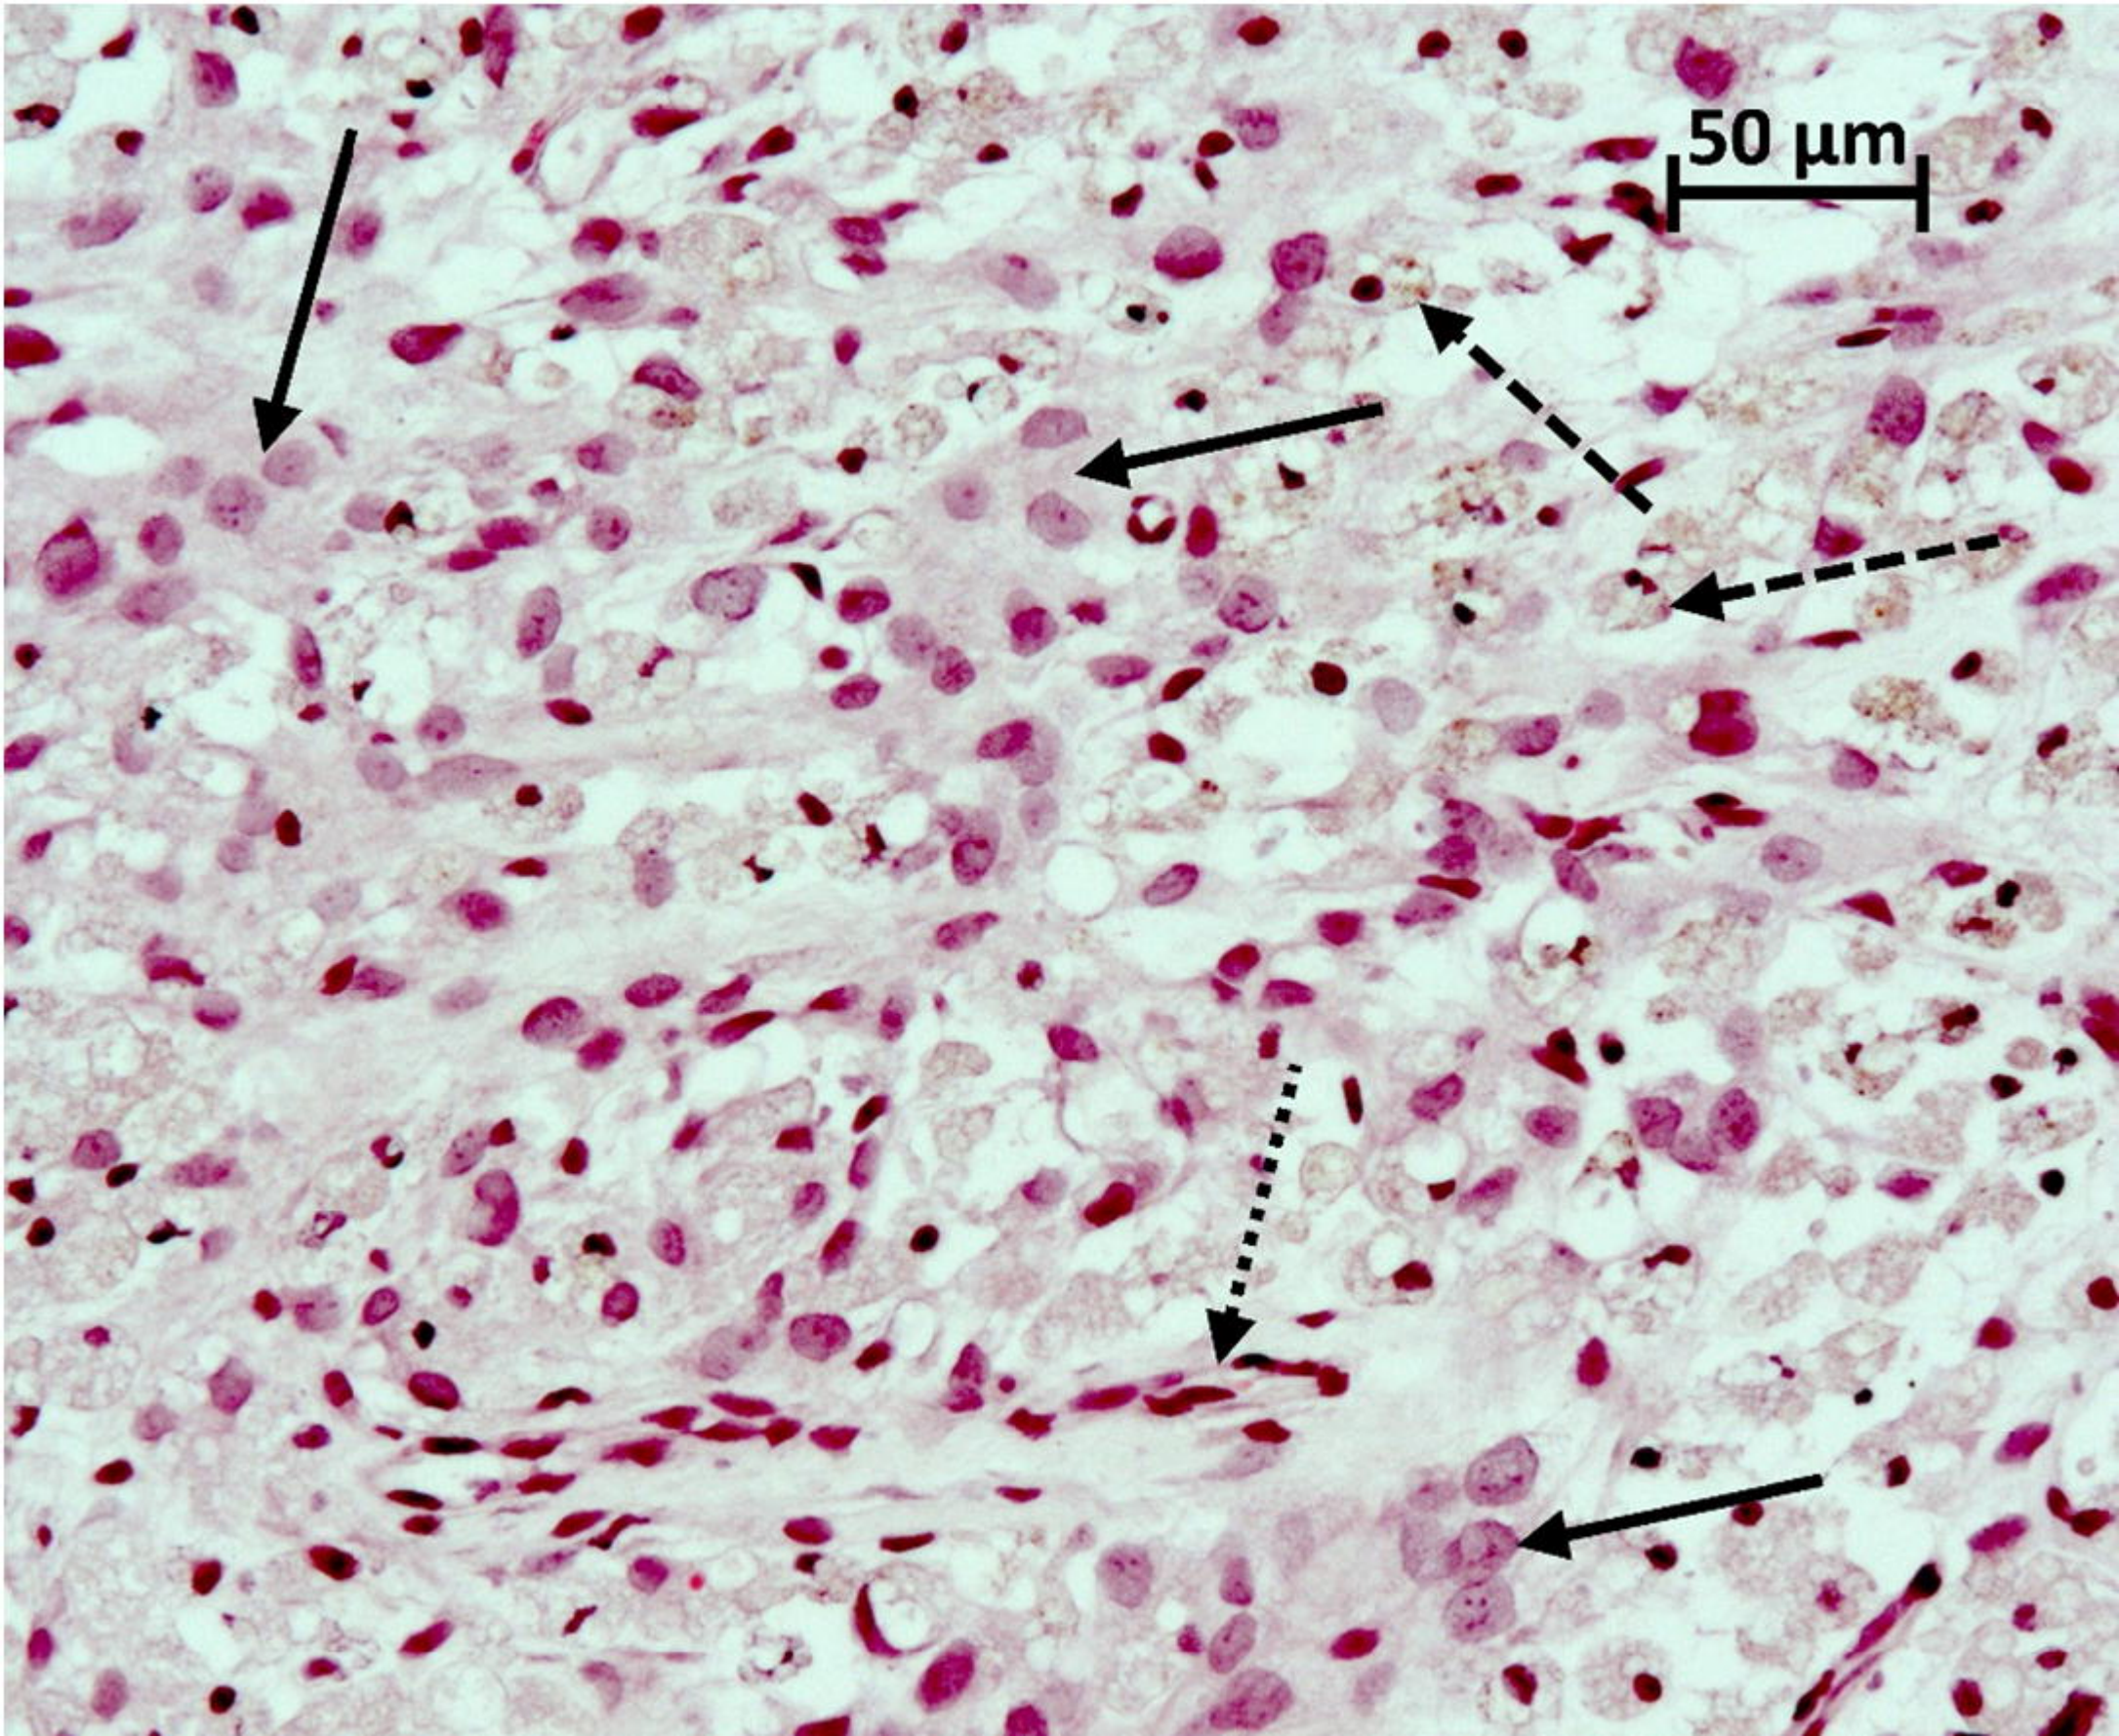

200  $\mu\text{m}$

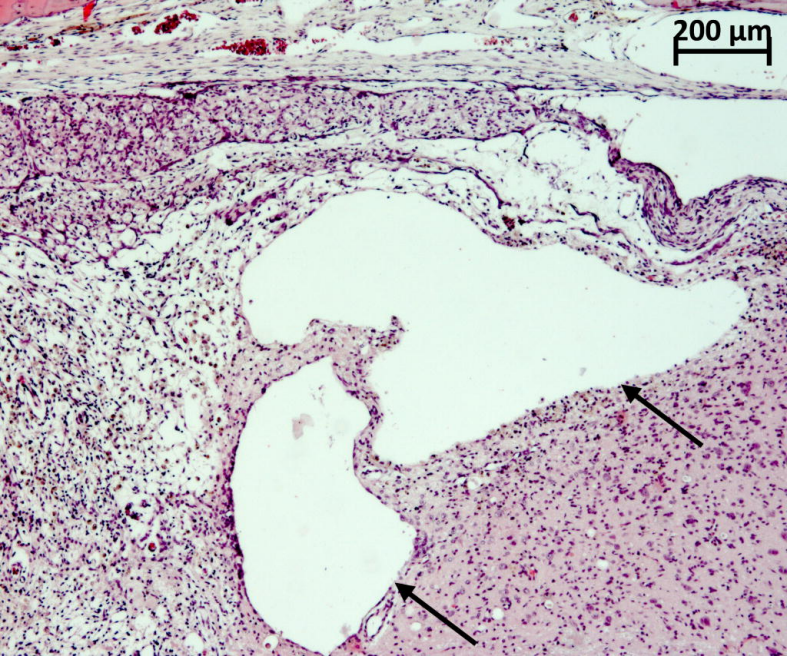

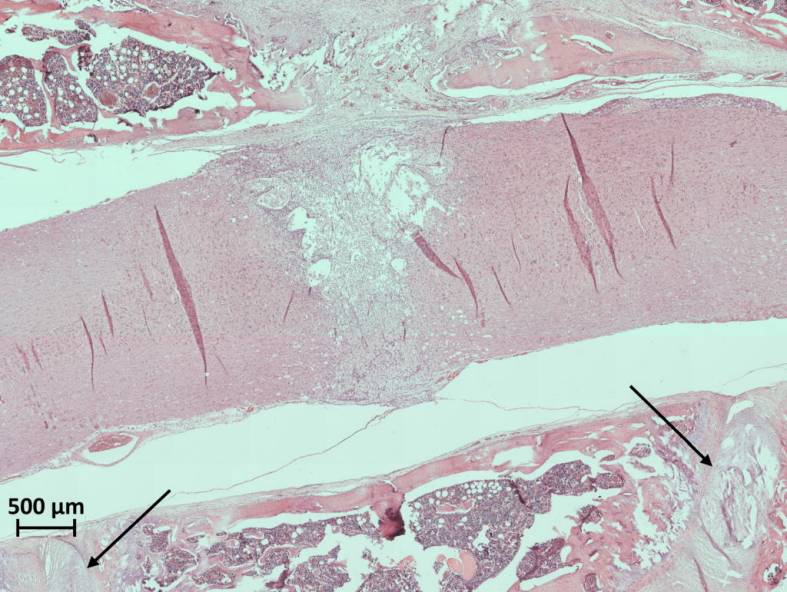

500 μm
